# Supplementary material for: Scoping Review of Handwashing and OCD During COVID-19 Concerning Increased Negative Mental Health
Source: Preprints.org preprint supplement (doi:10.20944/preprints202308.0740.v1), 2023-08-09
Supplement: Supplementary file 2 [file Supplementary file (S2) Google Scholar search.docx]

***Legend:***

Reports removed before screening:

Duplicates: Red—Ovid Blue—PubMed Purple—ProQuest Green—Web of Science Gold—ProQuest

Not peer reviewed: Yellow

Reports excluded: Dark red—no handwashing Grey—no mental health Moss—no OCD

**Page 1**

[HTML] Hand Washing: When Ritual Behavior Protects! Obsessive–Compulsive Symptoms in Young People during the COVID-19 Pandemic: A Narrative Review

F Demaria, M Pontillo, C Di Vincenzo… - Journal of Clinical …, 2022 - mdpi.com

… ) pandemic had a profound impact on the lifestyles and mental health of young people. It

has been hypothesized that the focus on hygiene and the fear of contamination/infection during …

Save Cite Cited by 8 Related articles All 9 versions

[PDF] sagepub.com

Contamination compulsions and obsessive-compulsive disorder during COVID-19

IE Perkes, V Brakoulias… - Australian & New …, 2020 - journals.sagepub.com

… avoidance and handwashing for those unaccustomed, that is without OCD, … COVID-19 has

had an unexpected positive impact for the mental health of some, but not all, people with OCD…

Save Cite Cited by 10 Related articles All 6 versions

[HTML] nih.gov

[HTML] Impact of COVID-19 on obsessive compulsive disorder (OCD)

A Chakraborty, S Karmakar - Iranian journal of psychiatry, 2020 - ncbi.nlm.nih.gov

… COVID-19 infection. The effect of excessive handwashing for health on obsessive compulsive

disorder … in modifying psychiatric illnesses (22). Furthermore, country specific situations of …

Save Cite Cited by 93 Related articles All 12 versions

[HTML] jmir.org

[HTML] … of perceived stress, anxiety, depression, and obsessive-compulsive symptoms in health care workers and other workers in Alberta during the COVID-19 …

K Mrklas, R Shalaby, M Hrabok, A Gusnowski… - … Mental Health, 2020 - mental.jmir.org

… In our study, the prevalence of worry about dirt, germs, and viruses and compulsive

handwashing behavior since the COVID-19 pandemic began was significantly higher in other …

Save Cite Cited by 101 Related articles All 11 versions

[PDF] ucl.ac.uk

Recognising and addressing the impact of COVID-19 on obsessive-compulsive disorder

R Shafran, A Coughtrey, M Whittal - The Lancet Psychiatry, 2020 - thelancet.com

… to obsessive-compulsive disorder receive specific information, with regard to responding to

COVID-19, on the need for effective handwashing… or exacerbation of mental health problems. …

Save Cite Cited by 83 Related articles All 5 versions

[PDF] mdpi.com

COVID-19 pandemic and mental health: prevalence and correlates of new-onset obsessive-compulsive symptoms in a Canadian province

A Abba-Aji, D Li, M Hrabok, R Shalaby… - … and Public Health, 2020 - mdpi.com

… public health measures (eg, requiring regular handwashing, … % of the sample reported

pre-COVID-19 OCD symptoms, an … and 53.8% had compulsive hand-washing. Post-hoc analysis …

Save Cite Cited by 136 Related articles All 19 versions

[HTML] nih.gov

[HTML] The other side of COVID-19: Impact on obsessive compulsive disorder (OCD) and hoarding

D Banerjee - Psychiatry research, 2020 - ncbi.nlm.nih.gov

… and compulsive hand washing are … , mental health needs might not be on the publci health

forefront leading to worsening of symptoms and late diagnoses. Many patients of OCD might …

Save Cite Cited by 233 Related articles All 6 versions

[HTML] scielo.br

[HTML] Obsessive-compulsive disorder during the COVID-19 pandemic

RM Silva, RG Shavitt, DL Costa - Brazilian Journal of Psychiatry, 2020 - SciELO Brasil

… Although the frequency of mental disorders is expected to increase during … handwashing,

which was previously considered excessive and one of the most common symptoms of OCD, …

Save Cite Cited by 30 Related articles All 23 versions

[HTML] nih.gov

[HTML] The impact of coronavirus (COVID‐19) in the diagnosis and treatment of obsessive‐compulsive disorder

LF Fontenelle, EC Miguel - Depression and anxiety, 2020 - ncbi.nlm.nih.gov

… potential threats (including washing hands frequent and avoiding physical … OCD symptoms,

it is important for mental health professionals to think about the potential impact of COVID‐19 …

Save Cite Cited by 103 Related articles All 10 versions

[HTML] nih.gov

[HTML] Obsessive-compulsive disorder during the COVID-19 pandemic

M Van Ameringen, B Patterson, J Turna… - Journal of psychiatric …, 2022 - ncbi.nlm.nih.gov

… health demands for increased and “proper” hand-washing … also asked mental health

questions pertaining to their OCD. … in their OCD symptoms during the COVID-19 pandemic and a …

Save Cite Cited by 10 Related articles All 10 versions

[HTML] tandfonline.com

[HTML] COVID 19 and its mental health consequences

A Kumar, KR Nayar - Journal of Mental Health, 2021 - Taylor & Francis

… Overemphasis on consistent handwashing (for twenty seconds) may affect a significant …

OCD and related maladaptive behaviors particularly due to consistent promotion of handwashing …

Save Cite Cited by 826 Related articles All 9 versions

[PDF] sagepub.com

Investigating the association between obsessive-compulsive disorder symptom subtypes and health anxiety as impacted by the COVID-19 pandemic: a cross …

A Hassoulas, K Umla-Runge, A Zahid… - Psychological …, 2022 - journals.sagepub.com

… with function 1, with hand-washing and distress avoidance … with the hand-washing sub-scale

of the COVID-19 Impact … with symptoms of OCD reported that their mental health was …

Save Cite Cited by 19 Related articles All 9 versions

[HTML] nih.gov

Full View

[HTML] Acute impact of COVID‐19 pandemic on phenomenological features in fully or partially remitted patients with obsessive–compulsive disorder

H Matsunaga, K Mukai, K Yamanishi - Psychiatry and clinical …, 2020 - ncbi.nlm.nih.gov

… increased risk of developing mental health problems, such … 4 The possibility has been

suggested that OCD patients may … about COVID‐19 in addition to having greater hand‐washing …

Save Cite Cited by 47 Related articles All 6 versions

[HTML] frontiersin.org

[HTML] Obsessive-compulsive disorder during the COVID-19 pandemic—a systematic review

ES Linde, TV Varga, A Clotworthy - Frontiers in psychiatry, 2022 - frontiersin.org

… Background: The COVID-19 pandemic and its associated … in mental health; individuals with

obsessive-compulsive … Evolutionarily, OCD symptoms like contamination fear, handwashing, …

Save Cite Cited by 22 Related articles All 7 versions

[PDF] cambridge.org

OCD and COVID-19: a new frontier

A Jassi, K Shahriyarmolki, T Taylor, L Peile… - The Cognitive …, 2020 - cambridge.org

… mental health impact of COVID-19. This paper shares the perspectives of expert clinicians

working with OCD considering how to identify OCD … OCD, for example repetitive handwashing/…

Save Cite Cited by 55 Related articles All 11 versions

[PDF] sciencedirect.com

Resilience predicts positive mental health outcomes during the COVID-19 pandemic in New Yorkers with and without obsessive-compulsive disorder

DM Hezel, AM Rapp, MG Wheaton, RR Kayser… - Journal of psychiatric …, 2022 - Elsevier

… the mental health effects of the COVID-19 pandemic, particularly for those … obsessive-compulsive

disorder (OCD) given the overlap between OCD symptoms (eg, excessive handwashing…

Save Cite Cited by 7 Related articles All 8 versions

[HTML] frontiersin.org

[HTML] Perceived impact of Covid-19 across different mental disorders: a study on disorder-specific symptoms, psychosocial stress and behavior

HL Quittkat, R Düsing, FJ Holtmann… - Frontiers in …, 2020 - frontiersin.org

… hand washing and disinfection in nearly all groups, but no substantial change in the symptom

severity of OCD… impact of Covid-19 on symptoms of GAD, PA, IA, SAD, DP, OCD, BDD, ED, …

Save Cite Cited by 92 Related articles All 10 versions

[PDF] cambridge.org

Acute exacerbation of OCD symptoms precipitated by media reports of COVID-19

I French, J Lyne - Irish journal of psychological medicine, 2020 - cambridge.org

… OCD (Cisler et al., 2010). Research published to date on the mental health effects of

COVID-19 … of contagion, intensification of ritual hand washing and excessive cleaning (consuming …

Save Cite Cited by 69 Related articles All 9 versions

[HTML] nih.gov

[HTML] … obsessive-compulsive disorder (OCD) under COVID-19: A clinician's guide from the International College of Obsessive Compulsive Spectrum Disorders …

NA Fineberg, M Van Ameringen… - Comprehensive …, 2020 - ncbi.nlm.nih.gov

… the known risks and impact of COVID-19 on physical and mental health. This includes the

… (eg, hand washing for 20 seconds with soap and water rather than ceasing hand washing …

Save Cite Cited by 202 Related articles All 26 versions

[HTML] nih.gov

Dealing with Corona virus anxiety and OCD

A Kumar, A Somani - Asian journal of psychiatry, 2020 - Elsevier

… frequency of washing hands increased to … psychiatric condition after advent of COVID-19,

but it is likely that many more such cases shall be seen in immediate future. As mental health …

**Page 2**

Impact of COVID‐19 pandemic on patients with obsessive compulsive and related disorders—Psychodermatological perspectives

B Hafi, NA Uvais, M Jafferany, TP Afra… - Dermatologic …, 2020 - ncbi.nlm.nih.gov

… like social distancing and hand hygiene to a maximum level. … impact of COVID‐19 on physical

and mental health should be … Importance of family support to OCD patients is most crucial …

Save Cite Cited by 4 Related articles All 5 versions

[HTML] lww.com

[HTML] COVID-19 as a “nightmare” for persons with obsessive-compulsive disorder: A case report from India

S Sahoo, S Bharadwaj, A Mehra… - Journal of Mental Health …, 2020 - journals.lww.com

… handwashing in individuals with OCD. Further, the doubts of being contaminated with germs

of COVID-19 … to COVID-19. While all these instructions are very understood from preventive …

Save Cite Cited by 3 Related articles All 3 versions

Implication of coronavirus pandemic on obsessive-compulsive-disorder symptoms

MF Sulaimani, NH Bagadood - Reviews on environmental health, 2021 - degruyter.com

… OCD, ERP, coronavirus pandemic, COVID-19, and OCD … mental health has greatly

influenced the prevalence of OCD … for COVID-19 include constant hand washing when moving …

Save Cite Cited by 27 Related articles All 9 versions

[HTML] nih.gov

[HTML] The impact of the coronavirus (COVID-19) pandemic on the development of obsessive-compulsive symptoms in Saudi Arabia

DA Alateeq, HN Almughera, TN Almughera… - Saudi Medical …, 2021 - ncbi.nlm.nih.gov

… washing hands repeatedly until the skin is harmed. Thus, researchers are considering the

potential impact of COVID-19 on obsessive-compulsive disorder (OCD)… mental health illnesses …

Save Cite Cited by 16 Related articles All 12 versions

[PDF] sciencedirect.com

Obsessive compulsive disorder during the COVID-19 pandemic: A brief review of course, psychological assessment and treatment considerations

CE Maye, KD Wojcik, AE Candelari… - … Obsessive-Compulsive …, 2022 - Elsevier

… has continued to be an impairing mental health condition regardless of symptom …

impairment that handwashing and contamination has on individuals with OCD during COVID-19. …

Save Cite Cited by 8 Related articles All 6 versions

[HTML] nih.gov

COVID-19 and obsessive-compulsive symptoms in a large multi-site college sample

NC Berman, A Fang, SS Hoeppner, H Reese… - … of obsessive-compulsive …, 2022 - Elsevier

… The COVID-19 pandemic has had a devastating impact on mental health, and our … ?)

and repetitive compulsions (eg, excessive handwashing and sanitizing). A common theme for …

Save Cite Cited by 5 Related articles All 8 versions

[HTML] nih.gov

➽The impact of the COVID-19 pandemic on patients with OCD: Effects of contamination symptoms and remission state before the quarantine in a preliminary naturalistic …

P Davide, P Andrea, O Martina, E Andrea, D Davide… - Psychiatry …, 2020 - Elsevier

… washing hands in health advisories, symptoms of OCD might worsen, as shown by the

long-term excessive handwashing … patients with OCD accessing mental health services undergo …

Save Cite Cited by 245 Related articles All 9 versions

[HTML] psychiatrist.com

[HTML] COVID-19 and obsessive-compulsive disorder: the nightmare just got real

A Jain, KP Bodicherla, A Bashir… - … for CNS disorders, 2021 - psychiatrist.com

… OCD is the sixth most disabling psychiatric illness with a lifetime prevalence of 2.3% among

… , as handwashing is considered to be one of the safest precautions to prevent COVID-19. …

Save Cite Cited by 27 Related articles All 6 versions

[HTML] springer.com

[HTML] … of knowledge, attitude, socioeconomic burden, and mental health disorders of COVID-19 pandemic between general population and health care workers in …

GK Ahmed, HKA Ramadan, SM Refay… - The Egyptian journal of …, 2021 - Springer

… mental health problems regarding anxiety, depression, and obsessive-compulsive disorder

during COVID-19 … as the use of detergents, frequent handwashing, and cleaning of frequently …

Save Cite Cited by 31 Related articles All 13 versions

[PDF] cureus.com

[PDF] Depression and obsessive-compulsive disorders amid the COVID-19 pandemic in Saudi Arabia

N AlHusseini, M Sajid, A Altayeb, S Alyousof… - Cureus, 2021 - cureus.com

… the spread of COVID-19, such as repeated hand washing, … The effect of COVID-19 lockdowns

on mental illness frequency … lockdown will alter mental wellbeing in healthy individuals [12]…

Save Cite Cited by 22 Related articles All 11 versions

[HTML] springer.com

[HTML] An investigation of the effect of COVID-19 on OCD in youth in the context of emotional reactivity, experiential avoidance, depression and anxiety

İ Seçer, S Ulaş - International journal of mental health and addiction, 2021 - Springer

… psycho-social disorders, in this study the relationship between fear of COVID-19 and OCD

was … , and the mediating role of emotional reactivity, experiential avoidance and depression-…

Save Cite Cited by 157 Related articles All 13 versions

[HTML] nih.gov

[HTML] Coronaphobia revisted: A state-of-the-art on pandemic-related fear, anxiety, and stress

GJG Asmundson, S Taylor - Journal of anxiety disorders, 2020 - ncbi.nlm.nih.gov

… the nuanced mental health impacts of the COVID-19 pandemic. … health measures such as

social distancing and handwashing, … , including PTSD and OCD. We encourage researchers to …

Save Cite Cited by 78 Related articles All 5 versions

[PDF] sagepub.com

Full View

COVID-19 pandemic fears and obsessive-compulsive symptoms in adolescents with pre-existing mental disorders: An exploratory cross-sectional study

YS Khan, M Jouda, Y Albobali… - Clinical Child …, 2022 - journals.sagepub.com

… of contamination and compulsive handwashing found in OCD, as one of its … handwashing,

social distancing, etc.) can, therefore, trigger significant distress among individuals with OCD…

Save Cite Cited by 13 Related articles All 7 versions

COVID-19 pandemic and mental health in Lebanon: a cross-sectional study

R El Othman, E Touma, R El Othman… - … Journal of Psychiatry …, 2021 - Taylor & Francis

… stress, depression, anxiety and obsessive-compulsive traits during the COVID-19 pandemic

… measures, frequent and longer duration of hand washing, obedience to quarantine, buying …

Save Cite Cited by 53 Related articles All 6 versions

[PDF] sagepub.com

Full View

The COVID-19 pandemic and obsessive–compulsive disorder in young people: Systematic review

C Cunning, M Hodes - Clinical child psychology and …, 2022 - journals.sagepub.com

… The emphasis on handwashing and the cleaning of surfaces in government guidelines, the

… suggested that fear of COVID-19 may exacerbate existing psychological disorders. It should …

Save Cite Cited by 35 Related articles All 7 versions

[HTML] nih.gov

[HTML] Psychiatric comorbidities among COVID-19 survivors in North India: A cross-sectional study

SA Dar, MM Dar, S Sheikh, I Haq… - … education and health …, 2021 - ncbi.nlm.nih.gov

… and an equal number had compulsive handwashing. … of psychiatric illness before being

diagnosed with COVID-19 (yes/… In this study, OCD contamination symptoms were associated with …

Save Cite Cited by 12 Related articles All 9 versions

[PDF] cambridge.org

Obsessive–compulsive disorder—contamination fears, features, and treatment: Novel smartphone therapies in light of global mental health and pandemics (COVID-19 …

B Jalal, SR Chamberlain, TW Robbins… - CNS spectrums, 2022 - cambridge.org

… patients, such probability of state transitioning is less certain leading to overreliance on

sensory confirmation (unattainable in this case), and effectively, repeated handwashing. …

Save Cite Cited by 13 Related articles All 10 versions

[HTML] frontiersin.org

[HTML] What happened to patients with obsessive compulsive disorder during the COVID-19 pandemic? A multicentre report from tertiary clinics in northern Italy

B Benatti, U Albert, G Maina, A Fiorillo… - Frontiers in …, 2020 - frontiersin.org

… on mental health consequences of COVID-19 has been mainly focused on the effect of

social distancing, self-isolation and quarantining on mental health … Since hand washing is …

Save Cite Cited by 152 Related articles All 21 versions

[HTML] frontiersin.org

[HTML] Is fear of COVID-19 contagious? The effects of emotion contagion and social media use on anxiety in response to the coronavirus pandemic

MG Wheaton, A Prikhidko, GR Messner - Frontiers in psychology, 2021 - frontiersin.org

… and mental health symptoms during the COVID-19 pandemic. … spread of COVID-19, more

depression, anxiety, stress, and OCD … handwashing). A tenth item assessing perception that …

Save Cite Cited by 130 Related articles All 10 versions

[HTML] nih.gov

Full View

[HTML] Obsessive–compulsive disorder and related symptoms amidst the COVID‐19 outbreak: Results from the COLLATE project

WL Toh, E Neill, A Phillipou, EJ Tan… - Psychiatry and …, 2021 - ncbi.nlm.nih.gov

… (eg, repeated handwashing). These behaviors … COVID‐19 concerns in an OCD group

relative to a matched general population (GNP) group; (ii) compare group members’ mental health …

Save Cite Cited by 5 Related articles All 10 versions

**➽page 3**

Psychiatric and neuropsychiatric syndromes and COVID-19

R Farhan, P Llopis - The Lancet Psychiatry, 2020 - thelancet.com

… and Prevention recommends washing hands for at least 20 … the two parts of obsessive-compulsive

disorder: obsessions and … preset by a mental health professional involving a rational …

Save Cite Cited by 8 Related articles All 5 versions

[HTML] nih.gov

Exacerbation of obsessive compulsive disorder symptoms in children and adolescents during COVID-19 pandemic

Y Tanir, A Karayagmurlu, İ Kaya, TB Kaynar… - Psychiatry …, 2020 - Elsevier

… It has been reported that hand washing during pandemic is considered to be one of the …

prompt several preventive mental health approaches for young subjects with OCD—limiting …

Save Cite Cited by 159 Related articles All 6 versions

[HTML] biomedcentral.com

[HTML] The immediate effect of COVID-19 pandemic on children and adolescents with obsessive compulsive disorder

JB Nissen, D Højgaard… - BMC …, 2020 - bmcpsychiatry.biomedcentral.com

… or current OCD medication, and family psychiatric disorders could predict any changes in …

fact that everyone around them thoroughly were washing hands and were using hand sanitiser …

Save Cite Cited by 118 Related articles All 17 versions

[HTML] springer.com

[HTML] A perfect storm? Health anxiety, contamination fears, and COVID-19: lessons learned from past pandemics and current challenges

D Dennis, C Radnitz, MG Wheaton - International Journal of Cognitive …, 2021 - Springer

… of prescribed behavioral responses (ie, hand washing and … mental health professionals

respond in this time of crisis. … anxiety and OCD symptoms might occur in response to COVID-19. …

Save Cite Cited by 51 Related articles All 6 versions

[PDF] e-flux.com

[PDF] Rathole: Beyond the Rituals of Handwashing

O Timofeeva - E-Flux Journal, 2021 - worker01.e-flux.com

… the temporal structure of OCD. This would mean that Covid-19 probably has its own ratholes,

which our society – as a hybrid of disciplinary power and collective mental illness – tries to …

Save Cite Cited by 1 Related articles All 2 versions

[HTML] nih.gov

Efficacy of intensive CBT telehealth for obsessive-compulsive disorder during the COVID-19 pandemic

CM Pinciotti, NZ Bulkes, G Horvath… - … of obsessive-compulsive …, 2022 - Elsevier

… lack access to needed behavioral health treatment. Although some literature … to handwash

with the ultimate goal of reducing and perhaps overcorrecting by eliminating handwashing …

Save Cite Cited by 14 Related articles All 6 versions

[HTML] nih.gov

[HTML] Impact of COVID-19 on obsessive–compulsive disorder: A case series

AV Sowmya, P Singh, M Samudra… - Industrial Psychiatry …, 2021 - ncbi.nlm.nih.gov

… and would spend hours washing hands, which was extremely … COVID-19, and we also saw

new-onset OCD in patients of other psychiatric disorders such as generalized anxiety disorder…

Save Cite Cited by 2 Related articles All 6 versions

How is the COVID-19 pandemic affecting individuals with obsessive-compulsive disorder (OCD) symptoms?

MG Wheaton, HE Ward, A Silber, E McIngvale… - … of Anxiety Disorders, 2021 - Elsevier

… mental health effects caused by COVID-19 may be particularly acute for individuals with

obsessive-compulsive disorder (OCD… (eg, decisions to be around other people, handwashing). …

Save Cite Cited by 53 Related articles All 6 versions

[PDF] mtak.hu

The COVID-19 Pandemic and the Obsessive-Compulsive Phenomena, in the General Population and among OCD Patients: A Systematic Review

O Malas, MD Tolsá - European Journal of Mental Health, 2022 - ceeol.com

… mainly related to contamination obsessions and cleaning and hand washing compulsions.

Predisposing factors are being younger, low resilience, low social support, the presence of …

Save Cite Cited by 2 Related articles All 9 versions

Psychological aspects of COVID‐19

C Stamu‐O'Brien, S Carniciu… - Journal of Cosmetic …, 2020 - Wiley Online Library

… While obsessive compulsive disorder (OCD) due to COVID-19 … The constant hand washing

as a precaution measure to … of mental health problems in those diagnosed with COVID-19, …

Save Cite Cited by 45 Related articles All 5 versions

[PDF] ekb.eg

Impact of COVID 19 on patient with obsessive compulsive disorder

AA Wahba - … Egyptian Journal of Nursing Sciences and …, 2021 - ejnsr.journals.ekb.eg

… a strict emphasis on hand washing and disinfection, various … mental illness is as

directly affected by the worsening outbreak of COVID-19 as people living with obsessive-compulsive …

Save Cite Cited by 2 Related articles All 2 versions

[HTML] sagepub.com

Experiences of mental distress during COVID-19: Thematic analysis of discussion forum posts for anxiety, depression, and obsessive-compulsive disorder

G Brewer, L Centifanti, JC Caicedo… - Illness, Crisis & …, 2022 - journals.sagepub.com

… mental health conditions (anxiety, depression, and obsessive-compulsive disorder) during

the COVID-19 … fear of contamination and obsessive cleaning or hand washing. It is important, …

Save Cite Cited by 12 Related articles All 11 versions

[HTML] nih.gov

Contamination-related behaviors, obsessions, and compulsions during the COVID-19 pandemic in a United States population sample

J Samuels, C Holingue, PS Nestadt… - Journal of Psychiatric …, 2021 - Elsevier

… -COVID-19 to current change in obsessive-compulsive symptom … and treatment of mental

disorders during this period. … The behaviors included handwashing, use of hand sanitizer, …

Save Cite Cited by 30 Related articles All 9 versions

[HTML] nih.gov

Obsessive-compulsive disorder during COVID-19: Turning a problem into an opportunity?

L Jelinek, S Moritz, F Miegel, U Voderholzer - Journal of anxiety disorders, 2021 - Elsevier

… ” surfaces without subsequent handwashing. According to … in OCD symptomatology due

to the COVID-19 pandemic, n = 61 did not report a verified OCD diagnosis by a mental health …

Save Cite Cited by 111 Related articles All 9 versions

[PDF] mdpi.com

Mental health and personality traits during COVID-19 in China: a latent profile analysis

M Li, MZ Ahmed, FA Hiramoni, A Zhou… - … and public health, 2021 - mdpi.com

… behavior, frequent hand washing, etc. In … of OCD symptoms during the COVID-19 pandemic

[59]. As vulnerability indicators, different personality traits have been associated with OCD …

Save Cite Cited by 14 Related articles All 14 versions

[PDF] researchgate.net

[PDF] Obsessive-compulsive disorder patients and their well-being during lockdown caused due to COVID-19 pandemic

V Kumar - The International Journal of Indian Psychology, 2020 - researchgate.net

… to Covid-19 became an exclusive threat, which has added to panic and stress in masses which

can lead to several mental health issues like anxiety, obsessivecompulsive … handwashing …

Save Cite Cited by 3 Related articles

[HTML] springer.com

[HTML] A cross-sectional study on cognitive errors and obsessive-compulsive disorders among young people during the outbreak of coronavirus disease 2019

E Darvishi, S Golestan, F Demehri… - Activitas Nervosa Superior, 2020 - Springer

… of the COVID-19 pandemic are likely to create major mental … are panic of contamination and

excessive hand washing … -quality documentation of the mental health needs of individuals is …

Save Cite Cited by 37 Related articles All 8 versions

[HTML] nih.gov

Anxiety, OCD, delusions, and religiosity among the general public during the COVID‐19 pandemic

I Abdullah, S Parveen, N Shahid Khan… - International Social …, 2021 - Wiley Online Library

… the WHO's advisories are related to handwashing, sanitiser use, … mental health experts

should be vigilant about the surge of psychological disorders, such as OCD, during the COVID-19 …

Save Cite Cited by 7 Related articles All 6 versions

[HTML] nih.gov

Psychiatric disorders in children and adolescents during the COVID-19 pandemic

JD Palacio-Ortiz, JP Londoño-Herrera… - Revista Colombiana de …, 2020 - Elsevier

… of young people with anxiety disorders and pre-existing OCD in the COVID-19 context. …

• It may help to explain how the general public health guidelines (eg hand washing) can be …

Save Cite Cited by 54 Related articles All 11 versions

Assessment of antenatal anxiety, depression and obsessive-compulsive disorder in pregnant women in the COVID-19 era

C Hinds, SW Lindow, M Abdelrahman… - … of Psychological …, 2021 - cambridge.org

… and public health around handwashing due the pandemic … Self-reported mental health

issues related to COVID19 are … described their mental health to be worse in the COVID-19 era. …

**page 4**

[HTML] Including children with developmental disabilities in the equation during this COVID-19 pandemic

R Aishworiya, YQ Kang - Journal of autism and developmental disorders, 2021 - Springer

… Mental health disorders such as generalized anxiety disorder, phobias, … with OCD are

susceptible to an increase in compulsive behaviors such as prolonged hand-washing fueled by …

Save Cite Cited by 176 Related articles All 12 versions

[HTML] nih.gov

… of uncertainty as a factor linking obsessive-compulsive symptoms, health anxiety and concerns about the spread of the novel coronavirus (COVID-19) in the United …

MG Wheaton, GR Messner, JB Marks - Journal of obsessive-compulsive …, 2021 - Elsevier

… behavioral changes in response to COVID-19 (eg, decisions to be around other people,

handwashing)… tap into other dimensions of COVID-19's impact on mental health (eg, worry about …

Save Cite Cited by 104 Related articles All 7 versions

[HTML] nih.gov

[HTML] Contamination and infection: what the coronavirus pandemic could reveal about the evolutionary origins of obsessive-compulsive disorder

RP Rajkumar - Psychiatry research, 2020 - ncbi.nlm.nih.gov

… elaborate procedures described for hand hygiene and the use of … of healthy individuals and

patients with OCD to the COVID-19 outbreak could deepen our understanding of this disorder…

Save Cite Cited by 22 Related articles All 6 versions

COVID-19 related differences in the uptake and effects of internet-based cognitive behavioural therapy for symptoms of obsessive-compulsive disorder

I Li, M Millard, H Haskelberg, M Hobbs… - Behavioural and …, 2022 - cambridge.org

… iCBT for OCD is yet to be examined during COVID-19, it may … to support the mental health

of individuals experiencing OCD … and handwashing) and public health recommendations …

Save Cite Cited by 16 Related articles All 9 versions

[HTML] nih.gov

[HTML] Impact of COVID-19 on exposure and response prevention for obsessive-compulsive disorder: Present and post-pandemic considerations

EA Storch, SC Schneider, A Guzick, D McKay… - Psychiatry …, 2020 - ncbi.nlm.nih.gov

… psychological treatment for adult and childhood OCD is … triggers that evoke obsessive-compulsive

symptoms while the … ‘contaminated’ objects without washing hands, shaking hands …

Save Cite Cited by 24 Related articles All 6 versions

[PDF] academia.edu

[PDF] Mental health in pandemic covid-19

A Pragholapati - Available at SSRN, 2020 - academia.edu

… and obsessive-compulsive disorder (OCD) in large population groups. Excessive emphasis

on consistent hand washing … their health status, depression, insomnia, obsessivecompulsive …

Save Cite Cited by 127 Related articles

[PDF] srce.hr

COVID-19 pandemic: A serious threat for public mental health globally

S Anjum, R Ullah, MS Rana, H Ali Khan… - Psychiatria …, 2020 - hrcak.srce.hr

… usually classified as obsessive compulsive disorder (Williams et al. 2013). This form of OCD

can … obsessive compulsory disorder symptoms which include repeated hand wash, checking …

Save Cite Cited by 75 Related articles All 10 versions

[HTML] nih.gov

[HTML] Impact of the COVID-19 pandemic on adult mental health

II Haider, F Tiwana, SM Tahir - Pakistan Journal of Medical …, 2020 - ncbi.nlm.nih.gov

… hand washing and the risk of infection after touching objects and meeting people as a part of

COVID-19 … , media and social media, enhances the risk of relapse in persons with OCD.19 …

Save Cite Cited by 197 Related articles All 11 versions

[PDF] medrxiv.org

Impact of the COVID-19 pandemic on the short-term course of obsessive-compulsive disorder

LP Sharma, S Balachander, A Thamby… - … nervous and mental …, 2021 - journals.lww.com

… side of handwashing: How coronavirus is affecting people with OCD,” The … Mental Disorders,

5th Edition (DSM-5) OCD who attended the specialty OCD clinic of a university psychiatric …

Save Cite Cited by 36 Related articles All 9 versions

[HTML] scielo.br

[HTML] Obsessive-compulsive disorder reinforcement during the COVID-19 pandemic

F Ornell, DT Braga, DV Bavaresco… - Trends in psychiatry …, 2021 - SciELO Brasil

… news, such as not touching objects and washing hands in a ritualized way. Other

recommendations … Therefore, in addition to the need to care for the mental health of the …

Save Cite Cited by 18 Related articles All 16 versions

[PDF] cambridge.org

Impact of the COVID-19 pandemic on patients with pre-existing anxiety disorders attending secondary care

R Plunkett, S Costello, M McGovern… - … of psychological …, 2021 - cambridge.org

… strong recommendations on hand washing, as this anxiety disorder is … anxiety disorders

attending a general adult mental health … with OCD alone compared to other anxiety disorders, in …

Save Cite Cited by 51 Related articles All 10 versions

[HTML] nih.gov

Obsessive-compulsive symptoms and the Covid-19 pandemic: A rapid scoping review

JE Grant, L Drummond, TR Nicholson, H Fagan… - Neuroscience & …, 2022 - Elsevier

… health messages about washing hands… mental health care during the pandemic, the role

of trait compulsivity, what constitutes clinically significant deterioration in OCD, the public health …

Save Cite Cited by 28 Related articles All 7 versions

[HTML] jmir.org

[HTML] Effects of the COVID-19 pandemic on obsessive-compulsive symptoms among university students: prospective cohort survey study

G Ji, W Wei, KC Yue, H Li, LJ Shi, JD Ma, CY He… - Journal of medical …, 2020 - jmir.org

… as obsessive-compulsive disorder (OCD). OCD is a chronic and debilitating mental disorder

… loss of property, and spend a long time on handwashing due to a fear of contamination [13,…

Save Cite Cited by 81 Related articles All 11 versions

[HTML] frontiersin.org

[HTML] The Impact of COVID-19 Pandemic on Individuals With Pre-existing Obsessive-Compulsive Disorder in the State of Qatar: An Exploratory Cross-Sectional …

M Siddiqui, O Wadoo, J Currie, M Alabdulla… - Frontiers in …, 2022 - frontiersin.org

… mental disorders during the COVID-19 outbreak has been widely reported in scientific

publications and Obsessive-Compulsive Disorder (OCD) … people with hand washing compulsions. …

Save Cite Cited by 2 Related articles All 8 versions

[HTML] nih.gov

[HTML] The role of self-talk in predicting death anxiety, obsessive-compulsive disorder, and coping strategies in the face of coronavirus disease (COVID-19)

ES Damirchi, A Mojarrad, S Pireinaladin… - Iranian journal of …, 2020 - ncbi.nlm.nih.gov

… , which emphasize attention to hygiene issues and washing hands … the psychological

impacts of COVID-19 as a mental health disaster and a new epidemic disease. Psychological …

Save Cite Cited by 45 Related articles All 16 versions

[PDF] mdpi.com

Variation in obsessive-compulsive disorder symptoms and treatments: A side effect of COVID-19

W Liu, H Zhang, Y He - … of Environmental Research and Public Health, 2021 - mdpi.com

… mental health concern during the pandemic. Studies investigating public mental health during

COVID-19 … [5], and requires a thorough hand-washing [6]. Though effective studies have …

Save Cite Cited by 12 Related articles All 11 versions

[PDF] mdpi.com

Protective elements of mental health status during the COVID-19 outbreak in the Portuguese population

P Silva Moreira, S Ferreira, B Couto… - … and Public Health, 2021 - mdpi.com

… to potential detrimental effects in obsessive-compulsive (OC) … hand-washing rituals constitute

one of the main manifestations of the symptoms of obsessive-compulsive disorder (OCD) …

Save Cite Cited by 135 Related articles All 16 versions

[HTML] frontiersin.org

[HTML] Narrative review of COVID-19 impact on obsessive-compulsive disorder in child, adolescent and adult clinical populations

V Zaccari, MC D'Arienzo, T Caiazzo, A Magno… - Frontiers in …, 2021 - frontiersin.org

… of the COVID-19 pandemic for general mental health and the increase … of the pandemic on

obsessive-compulsive disorder (OCD). … measures against COVID-19, such as hand washing, …

Save Cite Cited by 21 Related articles All 13 versions

[PDF] srce.hr

The correlation between psychiatric disorders and COVID-19: A narrative review

Y He, R Yu, J Ren - Psychiatria Danubina, 2021 - hrcak.srce.hr

… Hand-washing is an important preventive measure for … transmission, which further

aggravates the suffering of patients with known washer OCD. Finally, individuals with severe …

Save Cite Cited by 25 Related articles All 9 versions

[HTML] sciencedirect.com

[HTML] Indians vs. COVID-19: the scenario of mental health

S Sharma, A Kundu, S Basu, NP Shetti… - Sensors …, 2020 - Elsevier

… with infected surfaces, regular hand washing, wearing mask … mental condition like

obsessive-compulsive disorder (OCD) … in handling COVID-19 patients are at greater risk to …

Save Cite Cited by 18 Related articles All 5 versions

**page 5**

[HTML] Prevalence of obsessive-compulsive disorder (OCD) among Iraqi undergraduate medical students in time of COVID-19 pandemic

TMJ Taher, SAL Al-fadhul… - Middle East …, 2021 - mecp.springeropen.com

… Obsessive-compulsive disorder (OCD) is reported to be the fourth most frequent mental

disorder … by the increasing efforts of handwashing and general hygiene as an essential step in …

Save Cite Cited by 19 Related articles All 13 versions

[PDF] tandfonline.com

The role of social media in the advent of COVID-19 pandemic: crisis management, mental health challenges and implications

J Abbas, D Wang, Z Su, A Ziapour - … management and healthcare …, 2021 - Taylor & Francis

… about the absence of an effective vaccine, medication, volunteer shortage, practicing social

distancing, lack of education on preventive measures, wearing a mask, washing hands, …

Save Cite Cited by 254 Related articles All 16 versions

[HTML] plos.org

[HTML] Covid-19—Beyond virology: Potentials for maintaining mental health during lockdown

AJL Munk, NM Schmidt, N Alexander, K Henkel… - PloS one, 2020 - journals.plos.org

… (all ORs between = 2.82 for obsessive-compulsive disorder and OR = 41.44 for panic …

measures (washing hands more often with soap-and disinfectant, rumination about germs). …

Save Cite Cited by 60 Related articles All 15 versions

[HTML] nih.gov

OCD during COVID-19: Understanding clinical and non-clinical anxiety in the community

CP Acenowr, ME Coles - Psychiatry Research, 2021 - Elsevier

… on the news and internet (eg, frequent handwashing, sanitizing, and wearing face masks). …

OCD is outwardly very recognizable as a mental disorder that is a cause for concern and …

Save Cite Cited by 14 Related articles All 7 versions

[HTML] nih.gov

Predicting COVID-19-related anxiety: The role of obsessive-compulsive symptom dimensions, anxiety sensitivity, and body vigilance

HJ Ojalehto, JS Abramowitz, SN Hellberg… - … of anxiety disorders, 2021 - Elsevier

… of COVID-19 and recommendations for frequent hand washing and use of … mental health

conditions which is a limitation given that pre-existing mental health and physical disorders may …

Save Cite Cited by 28 Related articles All 6 versions

[PDF] cambridge.org

How is COVID-19 affecting patients with obsessive–compulsive disorder? A longitudinal study on the initial phase of the pandemic in a Spanish cohort

P Alonso, S Bertolín, J Segalàs… - European …, 2021 - cambridge.org

… of the COVID-19 pandemic on emotional health are evident, … on patients with obsessive-compulsive

disorder (OCD). … of some OCD behaviors, such as continuous hand washing or glove …

Save Cite Cited by 37 Related articles All 13 versions

[HTML] springer.com

[HTML] Psychosocial health of school-aged children during the initial COVID-19 safer-at-home school mandates in Florida: a cross-sectional study

SL McKune, D Acosta, N Diaz, K Brittain, DJ Beaulieu… - BMC public health, 2021 - Springer

… on mental health and psychosocial effects of the COVID-19 … of respondents reporting

increased hand washing, avoiding … , OCD, and depression during the early days of the COVID-19 …

Save Cite Cited by 56 Related articles All 17 versions

[HTML] nih.gov

Conducting exposure and response prevention treatment for contamination fears during COVID-19: The behavioral immune system impact on clinician approaches to …

D McKay, C Minaya, EA Storch - Journal of Anxiety Disorders, 2020 - Elsevier

… infection, including hand washing immediately after touching … fears due to Obsessive

Compulsive Disorder (OCD), as … In this study, we investigated the attitudes of mental health …

Save Cite Cited by 32 Related articles All 7 versions

COVID-19 anxiety and mental health among university students during the early phases of the US pandemic

LJ Dixon, SM Witcraft, MJ Schadegg - … of American College Health, 2023 - Taylor & Francis

… Anxiety, the 5-item format of the subscales for the Dimensional Obsessive Compulsive Scale…

on threat, and adherence to public health guidelines (eg, handwashing) in the context of an …

Save Cite Cited by 9 Related articles All 5 versions

Increases in symptoms associated with obsessive-compulsive disorder among university students during the COVID-19 pandemic

ME Silverman, S Nag, A Kalishman… - … College Health, 2022 - Taylor & Francis

… hand hygiene), and … obsessive-compulsive symptomatology among the college population

will help to better understand the impact of the COVID-19 pandemic on student mental health …

Save Cite Cited by 4 Related articles All 5 versions

[HTML] springer.com

[HTML] Obsessive–compulsive disorder during the COVID-19 pandemic: a systematic review

AG Guzick, A Candelari, AD Wiese… - Current psychiatry …, 2021 - Springer

… measures like physical distancing and frequent handwashing, as well as widespread …

increases in mental health symptoms in individuals without psychiatric diagnoses relative to …

Save Cite Cited by 63 Related articles All 7 versions

[HTML] springer.com

[HTML] How are OCD patients and their families coping with the COVID-19 pandemic? A qualitative study

HLN Tandt, H Van Parys, L Leyman, C Purdon… - Current …, 2021 - Springer

… COVID-19 pandemic and the lockdown on the mental health, well-being and coping abilities

of OCD … The fear of contamination, the increased demands of hand washing, and the media …

Save Cite Cited by 22 Related articles All 9 versions

[HTML] frontiersin.org

[HTML] Self-reported obsession toward COVID-19 preventive measures among undergraduate medical students during the early phase of pandemic in Jordan

TN Al-Shatanawi, SA Sakka, KA Kheirallah… - … in Public Health, 2021 - frontiersin.org

… COVID-19 pandemic to investigate the prevalence of OCD … in compulsive hand washing

during the COVID-19 pandemic … of the COVID-19 pandemic on the mental health status of …

Save Cite Cited by 12 Related articles All 9 versions

[HTML] nih.gov

Expert opinion in obsessive-compulsive disorder: Treating patients with obsessive-compulsive disorder during the COVID-19 pandemic

AE Candelari, KD Wojcik, AD Wiese… - … Medicine in Psychiatry, 2021 - Elsevier

… behavioral responses to COVID-19 (eg, frequent handwashing) from obsessive-compulsive …

Mental health professionals are trained in navigating ethical dilemmas and are well-…

Save Cite Cited by 9 Related articles All 6 versions

[HTML] nih.gov

Facing the “new normal”: how adjusting to the easing of COVID-19 lockdown restrictions exposes mental health inequalities

NA Fineberg, L Pellegrini, D Wellsted, N Hall… - Journal of psychiatric …, 2021 - Elsevier

… We also attempted to ensure participants with a history of mental disorders including OCD

were not under-represented. However, most of the sample did not have adjustment difficulties …

Save Cite Cited by 16 Related articles All 11 versions

[PDF] pulmonarychronicles.com

The psychiatric effects of COVID-19 thus far: a review of the current literature

K Wright, A Sarangi, Y Ibrahim - … Respiratory and Critical …, 2020 - pulmonarychronicles.com

… exacerbated obsessive compulsive disorder (OCD). Medical … individuals, increasing basic

hand hygiene measures, using of … pertaining to COVID-19 and mental health, depression, …

Save Cite Cited by 31 Related articles All 5 versions

[HTML] nih.gov

Obsessive-compulsive symptoms among the general population during the first COVID-19 epidemic wave in Italy

F Pacitti, V Socci, G D'Aurizio, TB Jannini… - Journal of Psychiatric …, 2022 - Elsevier

… to experience a large COVID-19 health emergence, with the … , regular hand hygiene, and

personal protective equipment. … strategy for global mental health related to COVID-19 in both …

Save Cite Cited by 5 Related articles All 7 versions

[PDF] researchgate.net

[PDF] Psychological issues and stress on people in the purview of COVID-19 pandemic lockdown

NM Patnaik, S Maji - Food and Scientific Reports, 2020 - researchgate.net

… Interestingly perceived mental healthcare need was found in … OCD having a history of

excessive hand washing and cleaning to avoid contamination may be triggered by the COVID-19 …

Save Cite Cited by 17 Related articles All 3 versions

[HTML] psychiatrist.com

[HTML] Psychiatry's niche role in the COVID-19 pandemic

JF Goldberg - The Journal of Clinical Psychiatry, 2020 - psychiatrist.com

… handwashing mandates become a paradoxical injunction for patients with contamination-fearful

obsessive-compulsive disorder? … involves tending to the mental health needs and stress …

Save Cite Cited by 51 Related articles All 4 versions

[HTML] nih.gov

Psychological consequences and differential impact of the COVID-19 pandemic in patients with mental disorders

M Favreau, A Hillert, B Osen, T Gärtner… - Psychiatry …, 2021 - Elsevier

… ), and hygienic standards (handwashing, disinfection, physical … compared to depressive

disorders and OCD (only compared … of the COVID-19 pandemic in patients with mental disorders …

Save Cite Cited by 39 Related articles All 7 versions

**page 6**

[HTML] The acute impact of the early stages of COVID-19 pandemic in people with pre-existing psychiatric disorders: A systematic review

S Carvalho, CG Coelho, B Kluwe-Schiavon… - … and public health, 2022 - mdpi.com

… obsessive compulsive symptoms [39]. However, individuals with OCD symptoms severely

affected by COVID-19 … family associated with COVID-19, and frequent hand washing by other …

Save Cite Cited by 11 Related articles All 14 versions

[HTML] sciencedirect.com

[HTML] Mental health among healthcare personnel during COVID-19 in Asia: A systematic review

A Thatrimontrichai, DJ Weber… - Journal of the Formosan …, 2021 - Elsevier

… The incidence of somatizations and obsessive-compulsive traces was higher in situations …

Risk factors for COVID-19 in HCP included insufficient handwashing, longer work hours, and …

Save Cite Cited by 70 Related articles All 7 versions

[HTML] nih.gov

COVID-19 and OCD: Potential impact of exposure and response prevention therapy

JC Sheu, D McKay, EA Storch - Journal of Anxiety Disorders, 2020 - Elsevier

… impact of the COVID-19 on individuals with pre-existing mental health diagnoses. Particularly

… For example, hand washing was supported based on an estimated average level practiced …

Save Cite Cited by 49 Related articles All 9 versions

[HTML] nih.gov

[HTML] The COVID‐19 pandemic and death anxiety in the elderly

F Khademi, S Moayedi, M Golitaleb - … Journal of Mental Health …, 2021 - ncbi.nlm.nih.gov

… Isolated individuals with suspected COVID‐19 … their health status and experience

obsessive‐compulsive symptoms such as recurrent checking of body temperature and hand …

Save Cite Cited by 80 Related articles All 7 versions

[HTML] springer.com

[HTML] College student mental health: Understanding changes in psychological symptoms in the context of the COVID-19 pandemic in the United States

AI Roche, PJ Holdefer, EBK Thomas - Current Psychology, 2022 - Springer

… obsessive-compulsive symptoms. Given emerging literature indicating the negative impact of

COVID-19 on mental health … It may be that even if OCD behaviors such as hand-washing or …

Save Cite Cited by 9 Related articles All 7 versions

[PDF] cureus.com

[PDF] The impact of COVID-19 pandemic on obsession and compulsion symptoms in Saudi Arabia

N Alhujaili, A Alghamdi, TA Talib, M Alhaqbani… - Cureus, 2021 - cureus.com

… impact of the COVID-19 pandemic on mental health. Several … which can arise from hand

hygiene recommendations that are … between OCD symptoms during the COVID-19 pandemic …

Save Cite Cited by 8 Related articles All 11 versions

[PDF] cambridge.org

Washing COVID-19 away: COVID-19 and obsessive compulsive disorder

R André, MJ Gonçalves, C Sereijo, M Abreu - European Psychiatry, 2021 - cambridge.org

… Conclusions: This health crisis had a major impact on the mental health of our heroes. …

disorder; OCD. Results: From a theoretical point of view, the increased frequency of hand washing …

Save Cite Related articles All 6 versions

[PDF] cambridge.org

The impact of the COVID-19 pandemic on symptom subtypes of obsessive-compulsive disorder: a cross-sectional study

A Hassoulas, K Umla-Runge, O Adams… - BJPsych …, 2021 - cambridge.org

… OCD. The primary aim of this study was to investigate any significant changes to handwashing

… viours, across all symptom dimensions of OCD. The frequency of engaging with pandemic…

Save Cite Cited by 2 Related articles All 9 versions

[HTML] springer.com

[HTML] Covid-19, coronavirus and mental health rehabilitation at times of crisis

SK Chaturvedi - … of Psychosocial Rehabilitation and Mental Health, 2020 - Springer

… obsessive compulsive disorders [due to repeated hand washing], alcoholism and substance

use disorders… On one hand, it is the safety and precautions against the Covid-19 virus for …

Save Cite Cited by 113 Related articles All 9 versions

[HTML] springer.com

[HTML] Management of Obsessive-Compulsive Disorder before Bariatric Surgery with Cognitive Behavioral Therapy During COVID-19

SV Hosseini, Z Sobhani, MH Al-Ganbar - Obesity Surgery, 2021 - Springer

… Although handwashing is surely beneficial for preventing the … mental illness are as

directly affected by the worsening outbreak of COVID-19 as people living with obsessive-compulsive …

Save Cite Cited by 3 Related articles All 10 versions

[PDF] academia.edu

[PDF] Managing mental health issues among elderly during COVID-19 pandemic

R Girdhar, V Srivastava, S Sethi - Journal of geriatric care and …, 2020 - academia.edu

… 9, 10 Finally, it may exacerbate behavioral styles and symptoms of conditions such as

obsessive compulsive disorder (eg washing hands repeatedly, sanitizing the household articles). …

Save Cite Cited by 179 Related articles All 4 versions

[HTML] nih.gov

COVID-19, obsessive-compulsive disorder and invisible life forms that threaten the self

F Aardema - … of Obsessive-Compulsive and Related Disorders, 2020 - Elsevier

… worsen mental health issues, or even cause mental health … longer-term psychological impact

among health care workers (… , and apart from seeing the value of frequent handwashing, …

Save Cite Cited by 56 Related articles All 6 versions

[HTML] sciencedirect.com

[HTML] The impact of the prolonged COVID-19 pandemic on stress resilience and mental health: A critical review across waves

M Manchia, AW Gathier, H Yapici-Eser… - European …, 2022 - Elsevier

… outcomes (anxiety, depression, stress and obsessive-compulsive symptoms) than other …

change in behaviours (more frequent handwashing, avoiding crowded places) and worries …

Save Cite Cited by 174 Related articles All 21 versions

[PDF] sevenpublicacoes.com.br

The impact of hand washing and correlation with anxiety during the COVID-19 pandemic period

GA Nascimento, PSR Lucca… - Seven …, 2023 - sevenpublicacoes.com.br

… OCD”. And now, with so much emphasis on handwashing in health alerts, it's possible that

OCD … prevent the transmission of Covid-19 but also protect psychological health. Therefore, it …

Save Cite Cited by 1 Related articles

[PDF] mdpi.com

Coping strategies, anxiety and depression in OCD and schizophrenia: Changes during covid-19

Á Rosa-Alcázar, JL Parada-Navas… - Brain sciences, 2021 - mdpi.com

… fear of COVID-19 into obsessive–compulsive symptoms, while … anxiety/depression in the

obsessive–compulsive population. … predictors or mediators of mental health during COVID-19 [3]…

Save Cite Cited by 14 Related articles All 8 versions

[HTML] nih.gov

Impact of the COVID‐19 pandemic on the psychological health of individuals with mental health conditions: A mixed methods study

AE Miller, A Mehak, V Trolio… - Journal of Clinical …, 2022 - Wiley Online Library

… While no study to our knowledge has compared OCD symptoms to other mental health …

hand hygiene are likely to be particularly salient to individuals with the common subtype of OCD …

Save Cite Cited by 8 Related articles All 5 versions

Immediate reactions to the covid-19 pandemic in adults with obsessive-compulsive disorder: a self-report survey

DRMA Højgaard, C Duholm, JB Nissen… - Nordic journal of …, 2021 - Taylor & Francis

… mental disorders at an increased risk of relapse or cause them to experience new episodes

of their disorder due to the stress linked with the COVID-19 … well as hand washing guidelines, …

Save Cite Cited by 17 Related articles All 5 versions

[HTML] biomedcentral.com

[HTML] Investigating the correlation between perceived stress and health anxiety with obsessive–compulsive disorder and quality of life during COVID-19 pandemic

A Homayuni - BMC psychology, 2023 - bmcpsychology.biomedcentral.com

… such as washing hands, … COVID-19 pandemic affected people's mental health negatively,

which in turn decreased their quality of life. Considering the importance of psychological health …

Save Cite Related articles All 12 versions

[HTML] biomedcentral.com

[HTML] The relationship between fear of Covid-19 and obsessive–compulsive disorder

M Dehghani, H Hakimi, M Talebi… - BMC …, 2023 - bmcpsychology.biomedcentral.com

… can lead to obsessive behaviors such as excessive hand washing. Being infected with … of

obsessive–compulsive disorder [28]. Long-term fear of illness causes mental health problems …

Save Cite Related articles All 14 versions

[HTML] nih.gov

Anxiety and safety behavior usage during the COVID-19 pandemic: The prospective role of contamination fear

KA Knowles, BO Olatunji - Journal of anxiety disorders, 2021 - Elsevier

… obsessive-compulsive washing symptoms as predictors of anxiety and safety behaviors in

response to COVID-19 … safety behaviors including frequent handwashing, physical distancing, …

Save Cite Cited by 137 Related articles All 8 versions

**page 7**

HTML] Needs, gaps and opportunities for standard and e-mental health care among at-risk populations in the Asia Pacific in the context of COVID-19: a rapid scoping …

JK Murphy, A Khan, Q Sun, H Minas, S Hatcher… - … for equity in health, 2021 - Springer

… We included records related to mental health or psychosocial risk factors and COVID-19

among at-risk groups; that referred to one or more APEC member economies or had a global, …

Save Cite Cited by 16 Related articles All 25 versions

[HTML] springer.com

[HTML] Intolerance of uncertainty and health-related anxiety in youth amid the COVID-19 pandemic: Understanding and weathering the continuing storm

C Korte, RD Friedberg, T Wilgenbusch… - Journal of clinical …, 2021 - Springer

… The emphasis on personal hygiene and handwashing as … obsessive–compulsive disorder

(OCD), generalized anxiety … (COVID-19) pandemic for child and adolescent mental health: A …

Save Cite Cited by 30 Related articles All 12 versions

The impact of COVID-19 on the treatment of obsessive-compulsive disorder

A Palo, JM D'Souza - Bulletin of the Menninger Clinic, 2022 - Guilford Press

… Given the established benefit of ERP for OCD, it is incumbent upon mental health provid…

mental contact with contamination triggers even after completing a CDC-sanctioned handwash (…

Save Cite Cited by 5 Related articles All 9 versions

[HTML] frontiersin.org

[HTML] Ahead of the curve: responses from patients in treatment for obsessive-compulsive disorder to coronavirus disease 2019

JM Kuckertz, N Van Kirk, D Alperovitz, JA Nota… - Frontiers in …, 2020 - frontiersin.org

… the potential for massive mental health impact. This has led … for OCD who were admitted

prior to any COVID-19 restrictions … Rather than resisting hand washing following exposure to …

Save Cite Cited by 21 Related articles All 7 versions

[HTML] nih.gov

Obsessive compulsive symptoms severity among children and adolescents during COVID-19 first wave in Israel‏‎

M Schwartz-Lifshitz, D Basel, C Lang… - … of obsessive-compulsive …, 2021 - Elsevier

… These items in the CY-BOCS questionnaire bear resemblance to public health guidelines

during COVID-19 (frequent hand washing and surface cleaning). Thus, we suggest that …

Save Cite Cited by 57 Related articles All 6 versions

[PDF] inem.pt

Mental health patterns during COVID-19 in emergency medical services (EMS)

S Monteiro Fonseca, S Faria, S Cunha… - International Journal of …, 2022 - emerald.com

… obsessive-compulsive symptoms and COVID-19 anxiety, all of which correlated positively with

each other. Mental health indicators also correlated with COVID-19 … specific mental health …

Save Cite Cited by 5 Related articles All 6 versions

The effects of the COVID-19 pandemic on patients with obsessive-compulsive disorder

R Tükel, O Başaran, S Ergün… - … Journal of Psychiatry …, 2023 - Taylor & Francis

… Studies on the mental health consequences of COVID-19 … vulnerability of mental health.

Yet the possible worsening of … That is, in the pandemic, the acceptance of handwashing and …

Save Cite Cited by 2 Related articles All 6 versions

[PDF] mdpi.com

The collateral damage of the COVID-19 outbreak on mental health and psychiatry

FAJ Simon, M Schenk, D Palm, F Faltraco… - … and public health, 2021 - mdpi.com

… Those with obsessive compulsive disorder (OCD) or OCD symptoms are at an increased

risk… may be unable to comply fully with hand washing, maintaining physical distance, covering …

Save Cite Cited by 12 Related articles All 11 versions

[HTML] hindawi.com

[HTML] Initial presentation of OCD and psychosis in an adolescent during the COVID-19 pandemic

S Nazeer, A Reddy - Case Reports in Psychiatry, 2022 - hindawi.com

… the COVID-19 pandemic has exacerbated psychiatric disorders in patients with psychiatric

history … , and lack of handwashing rituals prior to discharge. After his discharge from his first …

Save Cite Cited by 2 Related articles All 8 versions

[HTML] springer.com

[HTML] Development of the COVID-19-Specific Obsessive Compulsive Symptoms Scale with Various Validity and Reliability Proofs

A Şengül Avşar, V Avşar - International Journal of Cognitive Therapy, 2023 - Springer

… Obsessive–compulsive disorder (OCD) issues are among the main mental health effects of

COVID-19… and numerous health messages have called for frequent hand washing, paying …

Save Cite Related articles All 5 versions

[PDF] bmj.com

Outbreak of anorexia nervosa admissions during the COVID-19 pandemic

YV Haripersad, M Kannegiesser-Bailey… - Archives of Disease in …, 2021 - adc.bmj.com

… , economic and mental health consequences of COVID-19 would follow. … disorder, which

may be exacerbated by the increased focus on hand hygiene and fear of contracting COVID-19…

Save Cite Cited by 159 Related articles All 9 versions

[PDF] tandfonline.com

Prenatal stress and psychiatric symptoms during early phases of the COVID-19 pandemic in Italy

C Colli, C Penengo, M Garzitto, L Driul… - … of Women's Health, 2021 - Taylor & Francis

… protective behaviours such as handwashing. Citation16 … absence of obsessive-compulsive

symptoms, we used the OCD … how the COVID-19 pandemic is influencing the mental health of …

Save Cite Cited by 20 Related articles All 16 versions

[PDF] cambridge.org

A longitudinal evaluation of the impact of the COVID-19 pandemic on patients with pre-existing anxiety disorders

K Hennigan, M McGovern, R Plunkett… - … of Psychological …, 2021 - cambridge.org

… recommendations on handwashing, as this anxiety disorder is … anxiety disorders attending

a general adult mental health service … of COVID-19 between individuals with OCD and GAD. …

Save Cite Cited by 9 Related articles All 8 versions

[PDF] brieflands.com

The necessity of preventing obsessive-compulsive disorder during the COVID-19 pandemic

F Zareie - Iranian journal of psychiatry and behavioral sciences, 2020 - brieflands.com

… ) is a chronic, costly, and debilitating mental disorder characterized by time-consuming, …

COVID-19 to reduce intrusive thoughts. Besides, nurses can reassure people that hand washing …

Save Cite Cited by 6 Related articles All 6 versions

[HTML] frontiersin.org

[HTML] Psychological health conditions and COVID-19-related stressors among university students: A repeated cross-sectional survey

MC Zurlo, MF Cattaneo Della Volta… - Frontiers in …, 2022 - frontiersin.org

… conditions before and during the pandemic), we found that symptoms of Depression,

Phobic-Anxiety, Obsessive-Compulsive, and Psychoticism reported by students during the …

Save Cite Cited by 15 Related articles All 9 versions

[HTML] sagepub.com

Full View

Likely exacerbation of psychological disorders from Covid-19 response

TR Zolnikov, T Clark, T Zolnikov - … Care & Community Health, 2021 - journals.sagepub.com

… mental health outcomes, other disorders could develop or become intensified, like PTSD,

OCD, or hoarding disorder … and ritualistic cleaning and handwashing could intensify, leading to …

Save Cite Cited by 6 Related articles All 9 versions

[HTML] nih.gov

Cognitive Training via a mobile application to reduce obsessive-compulsive-related distress and cognitions during the COVID-19 outbreaks: a randomized controlled …

B Akin-Sari, M Inozu, AB Haciomeroglu, BC Cekci… - Behavior Therapy, 2022 - Elsevier

… psychiatric disorder causing significant impairment in functioning. The COVID-19 pandemic

has exacerbated OCD… such as repeated handwashing are then used to mitigate this distress. …

Save Cite Cited by 6 Related articles All 10 versions

[PDF] wiley.com

Exploring the ways in which COVID‐19 and lockdown has affected the lives of adult patients with anorexia nervosa and their carers

D Clark Bryan, P Macdonald… - … Eating Disorders …, 2020 - Wiley Online Library

… effects on their own psychological health. This is particularly … behaviours, such as excessive

handwashing. Spikes in … Increased health anxiety, general anxiety and heightened OCD …

Save Cite Cited by 97 Related articles All 10 versions

[PDF] apa.org

Online identification of obsessive-compulsive symptoms and relevant factors in patients with Covid-19 in Turkey during quarantine.

S Havlioglu, S Kahraman, Y Kizir… - European Journal of …, 2022 - psycnet.apa.org

… frequent hand-washing, one of the Covid-19 … psychiatric illness from the sample, we found

a positive and moderate correlation between the time elapsed since the diagnosis of Covid-19 …

Save Cite Cited by 2 Related articles All 6 versions

The COVID-19 pandemic and Obsessive-Compulsive Disorder, A Systematic Review of Comparisons between Males and Females

E Jalalifar, A Arad, M Rastkar, R Beheshti - Acta Neuropsychiatrica, 2023 - cambridge.org

… Obsessive-compulsive disorder is a chronic mental illness … behaviors (eg, hand washing

or checking), or mental acts, or … OCD in individuals, considering the fact that hand washing is …

Save Cite Related articles All 3 versions

**page 8**

[HTML] Changes in symptoms and severity of obsessive compulsive disorder in children and adolescent patients following the covid-19 pandemic

K Halil, O Selcuk, A Mahmoud - Archives of Clinical Psychiatry (São …, 2021 - SciELO Brasil

… to hygiene, frequent hand washing and wearing a mask … OCD, it is also known that they

affect disorder severity 27 27. Lıang, Leilei, et al. The effect of COVID-19 on youth mental health…

Save Cite Cited by 6 Related articles All 7 versions

[HTML] nih.gov

Fear and anxiety in COVID-19: preexisting anxiety disorders

R Shafran, S Rachman, M Whittal, A Radomsky… - … and Behavioral Practice, 2021 - Elsevier

… in fear and anxiety during COVID-19 both as a direct result of … stay inside and increase

hand-washing. Lockdown has been … because of his psychological disorders, OCD, and GAD. His …

Save Cite Cited by 23 Related articles All 7 versions

[HTML] frontiersin.org

[HTML] The impact of COVID-19 pandemic on searching for health-related information and cyberchondria on the general population in Italy

M Vismara, D Vitella, R Biolcati, F Ambrosini… - Frontiers in …, 2021 - frontiersin.org

… suffering from a physical/psychiatric illness. CYB showed a … , hand hygiene, wearing a

mask) were associated with lower … of health anxiety, fears of COVID-19, obsessive-compulsive …

Save Cite Cited by 37 Related articles All 10 versions

[HTML] springeropen.com

[HTML] Risk factors for mental health in general population during SARS-COV2 pandemic: a systematic review

F Biondi, M Liparoti, A Lacetera… - Middle East …, 2022 - mecp.springeropen.com

… The COVID-19 pandemic and its social restrictions have affected mental health globally. This

… (PTSD) stress and obsessive compulsive disorder (OCD) in the general population during …

Save Cite Cited by 4 Related articles All 10 versions

[PDF] ekb.eg

[PDF] Fear of COVID-19 Pandemic, Obsessive-Compulsive Traits and Sleep Quality among First Academic Year Nursing Students, Alexandria University, Egypt.

M Metwally Elsayed… - Egyptian Journal of Health …, 2021 - ejhc.journals.ekb.eg

… COVID-19 pandemic can lead to excessive, intense, and repeated mental health problems

such as obsessive-compulsive … into the trap of compulsive handwashing. They often find the …

Save Cite Cited by 6 Related articles All 5 versions

[HTML] brieflands.com

[HTML] Is COVID-19 the Trigger of Obsessive-Compulsive Disorder?

M Fardid, S Aghayan, F Sadeghian… - … and Behavioral …, 2021 - brieflands.com

… However, strict adherence to public health strategies may cause negative mental health …

, particularly frequent hand washing. People with obsessive-compulsive disorder (OCD) …

Save Cite Related articles All 6 versions

[HTML] nih.gov

Year of zoom in a year of doom: lessons learned delivering ERP remotely during the COVID-19 pandemic

DM Hezel, AM Rapp, S Glasgow, G Cridland… - … and Behavioral Practice, 2023 - Elsevier

… measures, many mental health professionals started providing … of and treatments for OCD.

Prior to the onset of the … Primary compulsions: excessive/ritualized hand washing/ showering/…

Save Cite Cited by 4 Related articles All 4 versions

[PDF] cureus.com

[PDF] A Review of Effects of Pandemic on the Patients of Obsessive-Compulsive Disorder

MV Gokhale, S Chakole - Cureus, 2022 - cureus.com

… physical health affected, but mental health … COVID-19 pandemic, the preventive measures

that were suggested were similar to the characteristics of those with OCD, like handwashing …

Save Cite Related articles All 11 versions

[PDF] cambridge.org

Risk of COVID-19 diagnosis and death in patients with mental illness: a cohort study

JY Seon, S Kim, M Hong, MK Lim… - … and psychiatric sciences, 2021 - cambridge.org

… ), dementia, anxiety, obsessive-compulsive disorder and … and COVID-19-related death risks

in patients with mental illness… and COVID-19-related death in patients with mental illness, as …

Save Cite Cited by 14 Related articles All 10 versions

[PDF] mdpi.com

Mental health impact of early stages of the COVID-19 pandemic on individuals with pre-existing mental disorders: a systematic review of longitudinal research

AM Kunzler, S Lindner, N Röthke, SK Schäfer… - … and Public Health, 2023 - mdpi.com

… , people with obsessive-compulsive disorder (OCD) could be more likely to experience an

elevated level of compulsive thoughts and actions during the pandemic (eg, handwashing). …

Save Cite Cited by 2 Related articles All 12 versions

[HTML] biomedcentral.com

[HTML] Prevalence and predicors of COVID-centred obsessive compulsive disorder among Iranian COVID-19 recovered individuals: a Bayesian analysis

AH Shafighi… - BMC …, 2023 - bmcpsychiatry.biomedcentral.com

… as the increased need for hand washing, which is considered … psychological sequels of

COVID-19, particularly the OCD, … of investigating the mental health status of COVID-19 recovered …

Save Cite Related articles All 16 versions

[HTML] nih.gov

[HTML] Mental health in times of COVID: Thoughts after the state of alarm

A González-Rodríguez, J Labad - Medicina Clinica (English Ed.), 2020 - ncbi.nlm.nih.gov

… for hand washing and avoiding physical contact, patients with obsessive-compulsive disorder

(OCD) may … In conclusion, the COVID-19 pandemic has forced mental health services and …

Save Cite Cited by 16 Related articles All 7 versions

[PDF] brieflands.com

Anxiety and obsession following the COVID-19 outbreak

A Adibi, H Jamshidbeigi, T Jamshidbeigi… - … and Behavioral …, 2020 - brieflands.com

… are the most common type of psychiatric disorders (4). Anxiety … ease in people with a history

of anxiety and OCD. The fear of … of times and duration of handwashing should not exceed the …

Save Cite Cited by 3 Related articles All 11 versions

[HTML] springer.com

[HTML] Obsessive–compulsive disorder post-COVID-19: a case presentation

AA Alkhamees - The Egyptian journal of neurology, psychiatry and …, 2021 - Springer

… pandemic because it focuses on hand hygiene. It is characterized by the … COVID-19

patients had the highest percentage in many psychiatric illnesses, including obsessive–compulsive …

Save Cite Cited by 6 Related articles All 13 versions

[PDF] tubitak.gov.tr

Managing life during the pandemic: communication strategies, mental health, and theultimate toll of the COVID-19

MH Türkçapar, Y Kahya… - Turkish Journal of …, 2021 - journals.tubitak.gov.tr

… such as social distancing and promoted hand-washing in the COVID-19 pandemic [31]. …

symptoms before the outbreak predicted OCD symptoms during the COVID-19, except fear of …

Save Cite Cited by 1 Related articles All 11 versions

[HTML] nih.gov

Individual obsessive-compulsive traits are associated with poorer adjustment to the easing of COVID-19 restrictions

NA Fineberg, L Pellegrini, J Burkauskas… - Journal of Psychiatric …, 2022 - Elsevier

… As COVID-19 restrictions ease, the public are expected to relinquish previously enforced …

in those with a history of mental disorder and obsessive-compulsive (OC) traits and symptoms, …

Save Cite Cited by 2 Related articles All 10 versions

[HTML] plos.org

[HTML] Quality of life and its related psychological problems during coronavirus pandemic

A Homayuni, Z Hosseini, N Shahabi, R Ezati Rad… - Plos one, 2022 - journals.plos.org

… 2019 (COVID-19) has endangered the psychological health of … of psychological disorders

such as obsessive-compulsive … frequently engage in handwashing behavior were buffered …

Save Cite Related articles All 10 versions

[PDF] oamjms.eu

Pandemic Coronavirus Disease-19-Induced Obsessive Compulsive Disorder on the Bank Employee

SD Purnama, MM Amin, E Effendy - Open Access Macedonian Journal of …, 2021 - oamjms.eu

… : COVID-19 pandemic also causes serious mental disorders and has become such a nightmare

or worst scenario for those experiencing OCD… social distancing, hand washing with soap, …

Save Cite Related articles All 4 versions

[HTML] mdpi.com

[HTML] Depression and Anxiety Symptoms “Among the Waves” of the COVID-19 Pandemic in Obsessive Compulsive Disorder and Adjustment Disorder Patients

G D'Urso, MV Pomes, A Magliacano, C Iuliano… - Healthcare, 2023 - mdpi.com

… Fear of infection, and frequent handwashing and cleaning are typical symptoms of

obsessive compulsive disorder (OCD), a mental disorder characterized by the presence of …

Save Cite Related articles All 10 versions

[HTML] nih.gov

[HTML] Widespread recommendations can change our habits of hand-washing and physical distance during the COVID-19 pandemic

SC Biehl, M Schmidmeier, TF Wechsler… - Clinical Psychology in …, 2021 - ncbi.nlm.nih.gov

… COVID-19 for themselves and for relatives as well as the incidence of pathological hand-washing

as occurring in obsessive compulsive … and increased hand-washing on mental health. …

Save Cite Cited by 2 Related articles All 11 versions

**page 9**

Obsessive compulsive disorder during coronavirus disease 2019 (COVID-19): 2-and 6-month follow-ups in a clinical trial

L Carmi, O Ben-Arush, L Fostick… - International Journal …, 2021 - academic.oup.com

… the coronavirus disease 2019 (COVID-19), and clinicians were … of COVID-19 on the symptom

severity of OCD patients. … , and reduced availability of mental health services has led to …

Save Cite Cited by 12 Related articles All 11 versions

[PDF] cambridge.org

Life-threatening obsessive–compulsive disorder precipitated by the COVID-19 pandemic in an adolescent

A Jayakumar, J Sanchez-Cerezo, A Khayam… - BJPsych …, 2022 - cambridge.org

… The impact on the mental health of many children and adolescents with OCD has … of

COVID-19 including mortality rates, health risks and hygiene/hand-washing campaigns Healthcare …

Save Cite Related articles All 7 versions

[PDF] ijnrph.com

Unveiling Indian Coping Tactics for Neurobehavioral Disorders in COVID-19 Confinement

Y Shrivastav, N Balekar - … Newgen Research in Pharmacy & Healthcare, 2023 - ijnrph.com

… understanding the hand washing protocols for the COVID-19 pandemic, … OCD, the home

confinements enforced during COVID-19 pandemic have shown effects on their mental health …

Save Cite

COVID-19 worry, mental health indicators, and preparedness for future care needs across the adult lifespan

M Maxfield, KA Pituch - Aging & mental health, 2021 - Taylor & Francis

… of COVID-19 could reinforce behaviors associated with OCD (eg excessive hand washing, …

anxiety among individuals with OCD symptoms may be challenging as we adapt to life with …

Save Cite Cited by 38 Related articles All 9 versions

[HTML] plos.org

[HTML] Acute mental health responses during the COVID-19 pandemic in Australia

JM Newby, K O'Moore, S Tang, H Christensen… - PloS one, 2020 - journals.plos.org

… precautionary behaviours (eg, hand hygiene, wearing a mask) … mental health during

COVID-19, ii) determine the socio-demographic and psychological factors that predict psychological …

Save Cite Cited by 441 Related articles All 17 versions

[PDF] dergipark.org.tr

The psychological impact of COVID-19 on university students: Their expectations of mental health professionals

MS Kaya, Y KOŞAN - International Journal of Psychology and …, 2021 - dergipark.org.tr

… outbreak, several common factors may have contributed to the increase in OCD. Situations

such as increased hand washing, suggesting a specific time to wash hands, and being …

Save Cite Cited by 2 Related articles All 5 versions

[HTML] biomedcentral.com

[HTML] Conradi-Hünerman-Happle Syndrome and Obsessive–Compulsive Disorder: a clinical case report

S de Jesus, ALR Costa, M Almeida… - BMC …, 2023 - bmcpsychiatry.biomedcentral.com

… to psychiatric consultation due to aggravation of her OCD … of hand-washing frequency during

the Covid-19 pandemic … OCD is the fourth most common mental disorder after depression, …

Save Cite Cited by 1 Related articles All 13 versions

[HTML] springer.com

[HTML] COVID stress syndrome: Clinical and nosological considerations

S Taylor - Current psychiatry reports, 2021 - Springer

… were correlated with obsessive-compulsive symptoms such … important COVID-19-related

psychological phenomena, with … patients to neglect hand-washing guidelines, which might be …

Save Cite Cited by 98 Related articles All 7 versions

[PDF] cambridge.org

Effects of strict COVID-19 lockdown on patients with obsessive-compulsive disorder compared to a clinical and a nonclinical sample

…, A de Bartolomeis, COVID in OCD Study Group - European …, 2023 - cambridge.org

… pandemic has had a dramatic impact on the mental health of the general … handwashing,

and cleaning are typical symptoms of obsessive-compulsive disorder (OCD), a mental disorder …

Save Cite Cited by 1 Related articles All 2 versions

[HTML] frontiersin.org

[HTML] An observational study of OCD patients treated with cognitive behavioral therapy during the covid-19 pandemic

V Zaccari, A Gragnani, V Pellegrini, T Caiazzo… - Frontiers in …, 2021 - frontiersin.org

… of the COVID-19 pandemic for general mental health and the … the potential effect of the

pandemic on OCD. The purpose of this … measures against COVID-19, such as hand washing, …

Save Cite Cited by 4 Related articles All 11 versions

[HTML] nih.gov

The perceived long-term impact of COVID-19 on OCD symptomology

D Dennis, E McGlinchey, MG Wheaton - Journal of Obsessive-Compulsive …, 2023 - Elsevier

… they had a prior diagnosis of OCD by a mental health professional, (b) lived … COVID-19 and

its variants, and behavioral changes in response to COVID-19 (eg, travel plans, handwashing…

Save Cite Related articles All 4 versions

Obsessive-compulsive disorder during and after Covid-19 pandemic

AŞ Kaçar - Mental Health Effects of COVID-19, 2021 - Elsevier

… For instance, frequent handwashing is a well-known symptom of OCD and the necessity

to frequently wash hands during the pandemic might further reinforce this behavior for many …

Save Cite Related articles All 3 versions

[PDF] hindawi.com

A Case of New-Onset Obsessive-Compulsive Disorder and Schizophrenia in a 14-Year-Old Male following the COVID-19 Pandemic

D Bibawy, J Barco, Y Sounboolian… - Case Reports in …, 2023 - hindawi.com

… related to compulsive hand washing and avoidance of door… Ford et al., “Mental health before

and during the COVID-19 … June 2020 UK COVID-19 lockdown response on mental health: a …

Save Cite Related articles All 7 versions

[HTML] nih.gov

[HTML] COVID-19 fear-induced anorexia nervosa and obsessive-compulsive disorder leading to fatal megaloblastic anemia: Lethal psychological complication of the …

S Khanna, D Talwar, S Kumar, S Acharya… - Journal of Family …, 2022 - ncbi.nlm.nih.gov

… and rumors related to COVID-19. Increased reporting of … on mental health with young

individuals believing COVID-19 … , COVID-19 has led to repetitive behaviors, like hand washing…

Save Cite Cited by 1 Related articles All 11 versions

[PDF] cureus.com

[PDF] The emergence of new-onset obsessive and compulsive disorder in an adolescent during COVID-19 pandemic

A Sejdiu, SA Basith, V Ayala, S Maheshwari - Cureus, 2021 - cureus.com

… and compulsive behavior of handwashing have been seen [4… that the COVID-19 pandemic

has had on the mental health of … on the impact of COVID19 on existing OCD symptoms in …

Save Cite Cited by 2 Related articles All 8 versions

[HTML] frontiersin.org

[HTML] Differences between the psychological symptoms of health workers and general community after the first wave of the COVID-19 outbreak in Spain

S Reno-Chanca, J Van Hoey… - Frontiers in …, 2021 - frontiersin.org

… limited to the impact of COVID-19 in psychologists, who are in charge of the mental health of

the … between mental health and OCD across the groups, as described in previous literature. …

Save Cite Cited by 1 Related articles All 11 versions

[PDF] researchgate.net

COVID-19 pandemic effects on college student mental health: A cross-sectional cohort comparison study

MJ Hirshberg, B Colaianne, KK Inkelas… - … College Health, 2023 - Taylor & Francis

… For example, there is evidence that increases in obsessive-compulsive symptoms observed

… Social distancing, facemask wearing, and handwashing were each negatively correlated …

Save Cite Cited by 1 Related articles All 4 versions

[HTML] mdpi.com

[HTML] Obsessive-Compulsive Disorder during the COVID-19 Pandemic

F Fiaschè, GD Kotzalidis, A Alcibiade… - Psychiatry …, 2023 - mdpi.com

… psychiatric disorders that showed a significant increase in incidence with the outbreak of

COVID-19 … be infected by COVID-19 and respond with increasing handwashing and social …

Save Cite Related articles All 2 versions

[PDF] psychiatryonline.org

Full View

Integrating videoconferencing into treatment for obsessive-compulsive disorder: Practical strategies with case examples

RR Kayser, M Gershkovich, S Patel… - Psychiatric …, 2021 - Am Psychiatric Assoc

… Our staff took this approach during the COVID-19 pandemic, … patients with predominant

handwashing or contamination fears… clients with OCD in a secondary care mental health setting . …

Save Cite Cited by 8 Related articles All 5 versions

[HTML] ijwph.ir

[HTML] Psychometric Properties of Obsession with COVID-19 Scale in the General Population of Kermanshah, Iran

S Reisi, K Sadeghi, A Parvizifard, S Behrozi… - … of War and Public Health, 2021 - ijwph.ir

… a rise in psychological disorders; … COVID-19, the prevalence of OCD in a lifetime was 2 to

3%. Of all the symptoms, the obsession with contamination and the compulsive handwashing …

Save Cite Related articles All 3 versions

**page 10**

COVID-19 Anxiety and Washing Obsessive-compulsive Symptoms: Stress Coping Styles as a Mediator

Z Zanjani, M Jandaghian, SR Alvani… - Current Psychiatry …, 2023 - ingentaconnect.com

… On the other hand, regular handwashing is protective advice to prevent COVID-19 and may

… gated the predictors and mediators of mental health during the COVID-19 pandemic. It was re…

Save Cite Related articles

[PDF] medrxiv.org

Dimensions and modulators of behavioural and mental-health changes during the Covid-19 pandemic: an N= 343,017 study

A Hampshire, P Hellyer, E Soreq, MA Mehta… - MedRxiv, 2020 - medrxiv.org

… consequences of the Covid-19 pandemic. a. Obsessive compulsive disorder and anxiety …

workers were more likely to recommend ‘maintaining personal hygiene/handwashing’ (t=3.199 …

Save Cite Cited by 14 Related articles All 5 versions

[HTML] mdpi.com

[HTML] A Case of Obsessive-Compulsive Disorder Triggered by the Pandemic

A Costa, S Jesus, L Simões, M Almeida, J Alcafache - Psych, 2021 - mdpi.com

… prevention, avoidance of handwashing always sought to be … character of OCD symptoms

during the COVID-19 pandemic, … mental health of vulnerable groups most affected during the …

Save Cite Cited by 2 Related articles All 3 versions

Worldwide scientific production on obsessive-compulsive disorders in times of COVID-19 pandemic

XM Calle-Ramírez, RM Hernández… - … de Farmacologia y …, 2022 - search.proquest.com

… hand washing or ordering, or mental … COVID-19 and OCD concerning the mental health

service as it is understandable due to the difficulties in pandemic times to access mental health …

Save Cite Related articles All 3 versions

[HTML] nih.gov

Modulating neuroinflammation in COVID-19 patients with obsessive-compulsive disorder

V Nezgovorova, CJ Ferretti, S Pallanti… - Journal of psychiatric …, 2022 - Elsevier

… effects of infection with COVID-19 on Obsessive-Compulsive (OC) … ” of hand-washing, there

is a risk of increasing OC spectrum … COVID-19 pandemic and mental health: prevalence and …

Save Cite Cited by 11 Related articles All 7 versions

[PDF] journals.co.za

Coronavirus disease 2019 (COVID-19) and psychiatric sequelae in South Africa: Anxiety and beyond

U Subramaney, AW Kim, I Chetty, S Chetty… - Wits journal of clinical …, 2020 - journals.co.za

… disorders, obsessive compulsive disorder, mood disorders, psychotic disorders, child and

adolescent mental health … Proper hand-washing techniques recommended may also reinforce …

Save Cite Cited by 14 Related articles All 8 versions

[HTML] springer.com

[HTML] Obsessive–compulsive disorder in treatment seeking children & adolescents during the COVID-19 pandemic

A Henein, A Pascual-Sanchez, S Corciova… - European Child & …, 2022 - Springer

… of the virus like handwashing are inherently repetitive, mimicking OCD behaviours.

Social … and Adolescent Mental Health Services (left y-axis) and referrals with OCD (right y-axis) …

Save Cite Cited by 2 Related articles All 10 versions

[PDF] mdpi.com

The COVID-19 pandemic and adolescents' psychological distress: A multinational cross-sectional study

HTM Nguyen, HV Nguyen, B Zouini, M Senhaji… - … and Public Health, 2022 - mdpi.com

… associated with COVID-19, such as frequent hand washing, … OCD symptoms described

that thoughts about COVID-19 … the influence of the COVID-19 pandemic on mental health, for …

Save Cite Cited by 9 Related articles All 14 versions

[PDF] techscience.cn

[PDF] Relationship between Obsessive-Compulsive Symptoms and Anxiety Levels during the COVID-19 Pandemic in Healthcare Professionals vs. Non-Healthcare …

F Kurhan, GZ Kamış, EFA Çim, A Atli… - … of Mental Health …, 2022 - cdn.techscience.cn

… the COVID-19 pandemic on anxiety levels, contamination and responsibility/control obsessions

and associated OC behaviors in healthcare versus non-healthcare … hand-washing have …

Save Cite Related articles All 3 versions

[PDF] researchgate.net

[PDF] Obsession with COVID-19 among health care providers

SS Jasem, MB Al-Jubouri - Turkish Journal of Physiotherapy and …, 2021 - researchgate.net

… Similarly, compulsive hand washing was associated with a … of OCD symptoms grew

dramatically during the COVID-19 … Mental health and psychosocial problems of medical health …

Save Cite Cited by 5 Related articles All 2 versions

[PDF] academia.edu

[PDF] Impact of COVID-19 on Patients with Obsessive Compulsive Disorder: A Review

S Bhardwaj, A Bhardwaj, R Parkash - academia.edu

… to tackle this viral illness such as hand hygiene, sanitization, avoiding … mental illnesses of

various types, OCD is the one which is directly affected by the worsening outbreak of COVID-19…

Save Cite Related articles

[HTML] frontiersin.org

[HTML] Viability Study of Machine Learning-Based Prediction of COVID-19 Pandemic Impact in Obsessive-Compulsive Disorder Patients

M Tubío-Fungueiriño, E Cernadas… - Frontiers in …, 2022 - frontiersin.org

… , by a mental health professional known to the OCD patients. The … , contact with COVID-19,

psychiatric condition prior to the … symptoms, such as compulsive hand-washing, related to the …

Save Cite Cited by 2 Related articles All 16 versions

[HTML] nih.gov

Multidisciplinary research priorities for the COVID-19 pandemic: a call for action for mental health science

EA Holmes, RC O'Connor, VH Perry, I Tracey… - The Lancet …, 2020 - thelancet.com

… data on the mental health effects of the COVID-19 pandemic across the … and mental health

of patients with COVID-19. There is an urgent need for research to address how mental health …

Save Cite Cited by 5609 Related articles All 42 versions

[HTML] sciencedirect.com

[HTML] Expert opinion in Obsessive-Compulsive Disorder: Could protective measures for COVID-19 contribute to the worsening of OCD symptoms?

S Baldi, K Schruers - Personalized Medicine in Psychiatry, 2021 - Elsevier

… , and compulsions related to hand washing or cleaning … mental illness and consequent

isolation from society normally has on individuals affected by this or other psychiatric disorders…

Save Cite Cited by 1 Related articles All 8 versions

[PDF] cureus.com

[PDF] The well-being of healthcare workers during the COVID-19 pandemic: a narrative review

H Mushtaq, S Singh, M Mir, A Tekin, R Singh… - Cureus, 2022 - cureus.com

… ), inadequate hand hygiene, and diagnosis of COVID-19 in a … Fear of contamination could

result in obsessive-compulsive … places HCWs at immense risk of physical and mental health …

Save Cite Cited by 5 Related articles All 15 versions

[PDF] wiley.com

Full View

COVID‐19 induced anorexia nervosa: A case series and brief review of literature

ST Esmaeeli, Z Rahimi, F Saeed… - Clinical Case …, 2023 - Wiley Online Library

… individuals with pre-existing mental illnesses. Additionally with the new … hand hygiene and

fear of contracting COVID-19, depression, anxiety, and obsessive–compulsive disorder (OCD) …

Save Cite Related articles All 6 versions

[HTML] nih.gov

Implications of the COVID-19 pandemic for people with bipolar disorders: A scoping review

M Fornaro, M De Prisco, M Billeci, E Ermini… - … of affective disorders, 2021 - Elsevier

… diagnosis, and 8 patients had comorbid OCD. To assess and … , avoiding public spaces,

handwashing, wearing facemasks), … of the COVID-19 pandemic on the utilization of mental health …

Save Cite Cited by 34 Related articles All 11 versions

[HTML] nih.gov

The Persian COVID stress scales (Persian-CSS) and COVID-19-related stress reactions in patients with obsessive-compulsive and anxiety disorders

V Khosravani, GJG Asmundson, S Taylor… - … of obsessive-compulsive …, 2021 - Elsevier

… mental health disorders and those with mood disorders. … patients with ADs and OCD (because

COVID-19 is very highly … anxiety disorders; Zareie, 2020) and to compare COVID-19-…

Save Cite Cited by 62 Related articles All 9 versions

[HTML] nih.gov

Coping with COVID-19: The sociomaterial dimensions of living with pre-existing mental illness during the early stages of the coronavirus crisis

D Lupton, S Lewis - Emotion, Space and Society, 2022 - Elsevier

… previously lived with obsessive compulsive disorder (OCD). She … up elements of her OCD

that had previously lain dormant. … public health messages and warnings about washing hands …

Save Cite Cited by 11 Related articles All 6 versions

WetTouch: Touching Ground in the Wearable Detection of Hand-Washing Using Capacitive Sensing

F Wolling, K Van Laerhoven, J Bilal… - … and other Affiliated …, 2022 - ieeexplore.ieee.org

… Abstract—The detection of hand-washing is not only of interest since the emergence of the

COVID-19 pandemic. Obsessivecompulsive disorder (OCD) often manifests itself in terms of …

Save Cite Cited by 1 Related articles All 4 versions

**page 11**

Unmasking of Obsessive Compulsive Disorder in a Vulnerable Preadolescent Girl due to COVID-19 Related Stress: A Case Report.

N CHAUHAN, A AGRAWAL… - Journal of Clinical & …, 2021 - search.ebscohost.com

… following COVID-19 appropriate behaviours (ie, hand washing, … regarding the psychological

impact of COVID-19 among … emergence of mental illness in children during COVID-19 times […

Save Cite Related articles All 2 versions

[HTML] wjgnet.com

[HTML] Fear of COVID-19 and emotional dysfunction problems: Intrusive, avoidance and hyperarousal stress as key mediators

…, PSICO-RECURSOS COVID-19 Study Group - World Journal of …, 2022 - wjgnet.com

… of COVID-19-related to quarantine on mental health as it has … dysfunction (ie agoraphobia,

OCD, panic, and health anxiety… hand washing), were directly related to fear of COVID-19 with …

Save Cite Cited by 1 Related articles All 6 versions

The Prevalence of OCD Like Symptoms Among UAE Residents During COVID-19 Pandemic

AA Miss, HI Miss, LMA Miss, LK Miss… - BJPsych Open, 2022 - search.proquest.com

… hand washing and social distancing. It is hypothesised that such sudden change would cause

excessive hygiene habits in people predisposed to OCD. Our … mental healthcare staff and …

Save Cite Related articles All 5 versions

[PDF] ekb.eg

Impact of COVID-19 on the Psychosocial Status of Saudi and Egyptian Population: Comparative Study

MAEA El-slamoni, MAH Shahin… - Tanta Scientific …, 2022 - tsnj.journals.ekb.eg

… mental health statuses during COVID-19 pandemic and future … -related anxiety and excessive

hand washing. However, … , depression, and OCD during the COVID-19 pandemic among …

Save Cite Cited by 2 Related articles All 3 versions

[HTML] frontiersin.org

[HTML] Emotional, behavioral, and psychological impact of the COVID-19 pandemic

AL Pedrosa, L Bitencourt, ACF Fróes… - Frontiers in …, 2020 - frontiersin.org

… the impact of COVID-19 for the mental health of the overall … of COVID-19, the development

of obsessive-compulsive … preventive measures for COVID-19, such as hand washing and self-…

Save Cite Cited by 394 Related articles All 10 versions

[HTML] springer.com

[HTML] Higher anxiety and perceived trauma among COVID-19 patients: a prospective comparative study

A Kordi, A Sarabi-Jamab, SV Shariat, N Rezaee… - BMC psychiatry, 2023 - Springer

… This study compared the severity of mental health conditions … , 53.8 had compulsion of hand

washing. This was beside 25.1 … This article estimates the total definite OCD prevalence as …

Save Cite Cited by 1 Related articles All 13 versions

[HTML] sciencedirect.com

[HTML] Impact of COVID-19 pandemic on emergency psychiatry-Millcreek community hospital, Erie, PA

A Janoczkin, S Kiers, N Edara, P He, Y Li - Comprehensive Psychiatry, 2021 - Elsevier

… Our study aimed to track trends of mental health problems in … , but we did, however, observe

an increasing trend in OCD … Viral spread mitigation strategies like hand washing and good …

Save Cite Cited by 5 Related articles All 6 versions

[PDF] cappsy.org

[PDF] COVID-19 Pandemic and Obsessive Compulsive Disorder

Z Okray - Psikiyatride Guncel Yaklasimlar, 2021 - cappsy.org

… preventive behaviors related to COVID-19, such as frequent hand washing and protection of

… pandemic, it has been determined that the COVID-19 pandemic affected the mental health …

Save Cite Cited by 1 Related articles All 4 versions

Analysis of tweets regarding psychological disorders before and during the COVID-19 pandemic: The case of Turkey

Ü Tankut, MF Esen, G Balaban - Digital Scholarship in the …, 2022 - academic.oup.com

… anxiety, compulsive handwashing behavior, post-traumatic stress disorder, panic … first study

to examine the relationship between COVID-19 and OCD, anxiety disorders, and depression …

Save Cite Cited by 1 Related articles All 2 versions

[PDF] researchgate.net

[PDF] Protecting youth mental health during the COVID-19 pandemic: A challenging engagement and learning process

C Rousseau, D Miconi - J Am Acad Child Adolesc Psychiatry, 2020 - researchgate.net

… emergency room with an exacerbation of her obsessive-compulsive disorder (OCD) symptoms

and suicidal ideation. Her pre-existing hand-washing rituals had become pervasive. She …

Save Cite Cited by 52 Related articles All 5 versions

[PDF] wiley.com

Full View

Experiences of parents of children with psychiatric disorder from Covid‐19 pandemic and its related quarantine: A qualitative study

N Samani, R Davari Ashtiani… - Health science …, 2022 - Wiley Online Library

… previously diagnosed OCD, which is similar to our findings. … -step instructions for a proper

hand-washing that can be added to … Covid-19 pandemic on the symptoms of patients with both …

Save Cite Related articles All 7 versions

[HTML] nih.gov

[HTML] COVID-19 and mental health: a review and the role of telehealth and virtual reality

R Sainz-Fuertes, JMG Mir, JM Valderas, K Bullock… - Digital …, 2020 - ncbi.nlm.nih.gov

… Patients with obsessive–compulsive disorder (OCD) symptoms related to cleanliness

and fear of infection are among the top affected patient population in times of pandemics. …

Save Cite Cited by 3 Related articles All 10 versions

[HTML] nih.gov

[HTML] Obsessive Compulsive Disorder as a Presenting Symptom of COVID-19: A case-series from Iran

M Owji, AN Moghadasi, F Gholamian… - Caspian Journal of …, 2022 - ncbi.nlm.nih.gov

… C, a 23-year-old man referred to the hospital with fever, cough, headache, and sudden

exacerbation of obsessional symptoms such as frequent hand washing and lengthy shower for …

Save Cite Cited by 1 Related articles All 10 versions

[PDF] highdilution.org

A Review on Anxiety Disorders During Covid-19 Pandemic:: Homoeopathic Perspective

D Gilla, J Ahammed, AL Akhila… - International Journal of …, 2021 - highdilution.org

… hand washing, cleaning, and disinfecting, could reinforce the … The long-term mental health

impact of COVID-19 may take … The impact of the COVID19 pandemic on patients with OCD: …

Save Cite Cited by 4 Related articles All 5 versions

[HTML] springer.com

[HTML] Mediating role of psychological flexibility in the effect of obsessive-compulsive symptoms on sleep quality among nurses during the COVID-19 pandemic

D Wang, B Lin, H Liang, Y Deng, L Zhang - Current Psychology, 2023 - Springer

… , strict hand washing and extensive cleaning of operating theatres have increased nurses’

awareness of compulsion. As nurses’ mental health … of nurses during the COVID-19 pandemic. …

Save Cite Related articles All 6 versions

[PDF] global-ocd.org

On uncertainty: OCD and Covid-19

C Lochner, C Marincowitz - Mental Health Matters, 2021 - journals.co.za

… of people with OCD present with this type of symptom cluster. While frequent handwashing

and sanitising are certainly necessary for preventing the spread of COVID-19, their effects on …

Save Cite Related articles All 2 versions

[HTML] nih.gov

[HTML] Psychological, addictive, and health behavior implications of the COVID-19 pandemic

MJ Zvolensky, L Garey, AH Rogers… - … research and therapy, 2020 - ncbi.nlm.nih.gov

… COVID-19 implications for mental health focusing on (a) anxiety/stress and mood disturbance,

(b) obsessive compulsive symptoms and disorders… exhibit poor hand washing procedures, …

Save Cite Cited by 147 Related articles All 9 versions

[PDF] academia.edu

[PDF] Self-efficacy of nurses during the pandemic Covid-19

A Pragholapati - Diunduh dari academia. edu, 2020 - academia.edu

… will be serious mental health implications from the COVID-19 … Excessive emphasis on

consistent hand washing (for twenty … health status, depression, insomnia, obsessivecompulsive …

Save Cite Cited by 32 Related articles

[PDF] researchsquare.com

Effects of COVID-19 on Anxiety, Depression and Other Mental Health Issues: A worldwide scope review.

DB Machado, FJO Alves, CSS Teixeira, AS Rocha… - 2020 - researchsquare.com

… or Obsessive Compulsive Disorder. In addition to studies that showed an in uence of the

COVID-19 pandemic on trauma or post-traumatic stress disorder (PTSD), psychological distress…

Save Cite Cited by 35 Related articles All 5 versions

[PDF] dergipark.org.tr

Psychological and social effects of COVID-19 pandemic on obstetrics and gynecology employees

ND Uzun, M Tekin, E Sertel, A Tuncar - Journal of Surgery and …, 2020 - dergipark.org.tr

… COVID-19 on mental health by protecting and promoting the … Later, repetitive hand washing,

and increased cleaning of the … led to increased psychiatric symptoms and OCD incidence in …

Save Cite Cited by 34 Related articles All 7 versions

**page 12**

… beliefs prospectively predict adherence to safety behaviours related to COVID‐19 through o bsessive–compulsive symptoms and COVID‐19 distress: A serial multiple …

E Trak, M Inözü - International Journal of Psychology, 2022 - Wiley Online Library

… of obsessive–compulsive symptoms, COVID-19 distress and … of preventing illnesses (eg

excessive hand-washing, disinfecting … mental health problems, especially anxiety disorders and …

Save Cite Cited by 1 Related articles All 9 versions

[PDF] umk.pl

The impact of COVID-19 on obsessive-compulsive disorder-literature review

P Grabowy, M Drożak, J Milanowska - Journal of Education, Health and …, 2022 - apcz.umk.pl

… has negatively impacted mental health of people with obsessive-compulsive disorder. The

… The media encouraged the use of disinfectants, frequent hand washing, wearing gloves, not …

Save Cite Related articles All 2 versions

[PDF] akdeniz.edu.tr

[PDF] The effect of coronavirus (COVID-19) outbreak on the mental well-being and mental health of individuals

A Sümen, D Adibelli - Perspectives in Psychiatric Care, 2021 - avesis.akdeniz.edu.tr

… panic, obsessive compulsive, stress, and trauma‐related disorders. As hand washing, … ,

may increase the risk of developing obsessive compulsive disorder.One of the major risks of …

Save Cite Cited by 19 Related articles All 6 versions

[HTML] nih.gov

An investigation of COVID-19 related worry in a United States population sample

J Samuels, C Holingue, PS Nestadt… - Journal of psychiatric …, 2021 - Elsevier

… handwashing, use of … COVID-19 worry score was substantially higher in those who

reported having ever been diagnosed with a psychiatric disorder (depression, obsessive-compulsive …

Save Cite Cited by 8 Related articles All 7 versions

[HTML] biomedcentral.com

[HTML] Impact of the fear of Covid-19 infection on intent to breastfeed; a cross sectional survey of a perinatal population in Qatar

SM Reagu, S Abuyaqoub… - BMC …, 2022 - bmcpregnancychildbirth …

… of hygienic measures like handwashing. Worries around … the Covid-19 pandemic and

perinatal obsessive–compulsive … the current pregnancy, past mental health history, self-reported …

Save Cite Cited by 3 Related articles All 13 versions

[PDF] researchgate.net

[PDF] … Internet-based Cognitive Behavioral Therapy for Mental Health, Post-traumatic Stress Disorder, and Obsessive-Compulsive Disorder in Students with COVID-19 …

FB Sheykhangafshe, A Fathi-Ashtiani, VS Niri… - 2023 - researchgate.net

… research indicated that ICBT reduced OCD in students suffering from COVID-19 anxiety. These

findings … recommendations such as wearing masks and gloves, washing hands and face, …

Save Cite Related articles All 5 versions

[PDF] modares.ac.ir

Impact of COVID-19 pandemic on the mental health of rural population in Iran

R Ghanbari Movahed… - Journal of Agricultural …, 2022 - jast.modares.ac.ir

… COVID-19 pandemic. Females tended to show more symptoms of obsessive-compulsive

disorder… Given that personal hygiene (eg, regular hand washing, use of masks and gloves) and …

Save Cite Cited by 1 Related articles All 39 versions

[HTML] nih.gov

[HTML] The dynamic network relationships of obsession and death from COVID-19 anxiety among Peruvian university students during the second quarantine

C Ramos-Vera - Revista Colombiana de Psiquiatria (English Ed.), 2021 - ncbi.nlm.nih.gov

… or treat COVID-19, except for the widely proposed measures of social distancing, mask and

hand hygiene.2 … OCD is a psychiatric disorder involving persistent and intrusive thoughts and …

Save Cite Cited by 4 Related articles All 6 versions

[PDF] kne-publishing.com

Experience of Iranian Patients with Obsessive-Compulsive Disorder from the COVID-19 Pandemic: A Qualitative Study

SS Mortazavi, M Salehi… - Journal of Iranian …, 2022 - publish.kne-publishing.com

… Family support during the lockdown, anxiety about COVID-19, and repeated hand washing

… Utilization of teleconsultation: mitigation in handling mental disorders in the COVID-19 era. …

Save Cite Related articles All 4 versions

[HTML] nih.gov

[HTML] Psychopathological problems related to the COVID‐19 pandemic and possible prevention with music therapy

W Mastnak - Acta Paediatrica (oslo, Norway: 1992), 2020 - ncbi.nlm.nih.gov

… and specific dispositions to mental disorders into account. … anxiety and obsessive‐compulsive

disorders and the COVID‐19 … getting infected, compulsive hand‐washing and disinfection, …

Save Cite Cited by 45 Related articles All 6 versions

[PDF] researchgate.net

Exploring the impact of COVID-19-related fear, obsessions, anxiety and stress on psychological well-being among adults in Pakistan

N Aslam, K Shafique, A Ahmed - The Journal of Mental Health …, 2021 - emerald.com

… Moreover, fear initiates safety-related actions (such as hand washing) that tends … COVID-19

pandemic suggests that the augmentation of obsessions or obsessive compulsive disorders …

Save Cite Cited by 11 Related articles All 5 versions

[PDF] ariel.ac.il

[PDF] Obsessive compulsive disorder during COVID-19–two-and six-month follow-ups. OCD during COVID-19

L Carmi, O Ben-Arush, L Fostick, H Cohen… - Int J …, 2021 - ariel.ac.il

… the Coronavirus Disease 2019 (COVID-19), and clinicians were … of COVID-19 on the

symptom severity of OCD patients. … and reduced availability of mental health services has led to …

Save Cite Cited by 4 Related articles All 2 versions

[HTML] frontiersin.org

[HTML] Impact of the COVID-19 pandemic on obsessive-compulsive symptoms in the Swiss general population

J Otte, N Schicktanz, D Bentz - Frontiers in Psychology, 2023 - frontiersin.org

… particularly at risk of experiencing deteriorating mental health conditions were those with …

as handwashing (compulsions) to prevent or reduce distress (American Psychiatric Association …

Save Cite Related articles

[HTML] sagepub.com

Understanding health anxiety in the COVID-19 pandemic

A Heinen, S Varghese, A Krayem… - … Journal of Social …, 2022 - journals.sagepub.com

… pandemic has affected mental health requires investigation. … the transmission of COVID-19,

such as handwashing, social … of obsessive-compulsive disorder [OCD] and panic disorder) …

Save Cite Cited by 12 Related articles All 8 versions

[HTML] springer.com

[HTML] Adaptation of the Turkish version of the obsession with COVID-19 scale (TR-OCS): its association with psychological distress and resilience

A Kartol, O Söner - Psicologia: Reflexão e Crítica, 2022 - Springer

… , and subsequently obsessive-compulsive disorder (OCD). … with OCD, especially those

with compulsive handwashing. … effects of the COVID-19 pandemic on the mental health of the …

Save Cite Related articles All 10 versions

[PDF] conacyt.mx

The role of telehealth in reducing the mental health burden from COVID-19

X Zhou, CL Snoswell, LE Harding… - … and e-Health, 2020 - liebertpub.com

… COVID-19. In the absence of a medical cure for COVID-19, the global response is a simple

public health … virus, and simple hygiene such as hand washing to reduce the risk of infection. …

Save Cite Cited by 1159 Related articles All 14 versions

[PDF] najah.edu

[PDF] Prevalence of Obsessive-Compulsive Behavior During COVID-19 Pandemic: A Cross-Sectional Study

صالح, مناهل - 2021‎ - repository.najah.edu

… of Health to develop a mental health assessment tool for the general population, for early

detection of obsessive-compulsive behavior during COVID-19 … , a hand-washing strategy does …

Save Cite Related articles All 2 versions

[PDF] jssuni.edu.in

Obsessive Compulsive Disorder with Porn Addiction during the COVID-19 Pandemic

V Pragya - Digital Journal of Clinical Medicine, 2022 - rescon.jssuni.edu.in

… with repeated hand wash, social distancing and testing to confirm … OCD and Porn Addiction

have emerged as major concern in COVID-19 pandemic related mental health disorders and …

Save Cite Related articles All 2 versions

[HTML] nih.gov

Interoceptive anxiety-related processes: Importance for understanding COVID-19 and future pandemic mental health and addictive behaviors and their comorbidity

MJ Zvolensky, BY Kauffman, L Garey, AG Viana… - … Research and Therapy, 2022 - Elsevier

… and its implications for public health. In this paper, … mental health and addictive behaviors

during the COVID-19 pandemic. We then provide a narrative review of the available COVID-19 …

Save Cite Cited by 6 Related articles All 7 versions

[HTML] nih.gov

Psychosocial impact of COVID-19

S Dubey, P Biswas, R Ghosh, S Chatterjee… - Diabetes & Metabolic …, 2020 - Elsevier

… to comply with basic hand hygiene regulations (which has … the misery of a known washer

OCD patient. On the other hand, … in physical and mental health during a disaster like COVID-19 […

Save Cite Cited by 2016 Related articles All 16 versions

**page 13**

[PDF] Prevalence of Obsessive Compulsive Disorder among Recovered Hospitalized Patients with COVID-19 after Discharge and its Relationship with Socio …

I Birjand - Med Sci, 2023 - rjms.iums.ac.ir

… hand washing and hygiene are more serious than ever before, and is certainly helpful in

preventing the spread of Covid-19, … physical health, Covid-19 also threatens their mental health. …

Save Cite Related articles

[HTML] sums.ac.ir

[HTML] Obsessive-Compulsive Disorder Traits and Preventive Behaviors during COVID-19 Pandemic: The Role of Self-Regulation Strategies

A Zareian Jahromi, MH Soltani… - … of School Health, 2022 - intjsh.sums.ac.ir

… Background: COVID-19 pandemic has brought the world … mental disorders, especially

obsessive-compulsive disorder (… strategies, OCD traits, and preventive behaviors during …

Save Cite Related articles All 5 versions

[PDF] researchgate.net

[PDF] The Silent victims of the Pandemic: Children and adolescents during the COVID-19

NV Vyjayanthi, D Banerjee… - … Adolescent Mental Health …, 2020 - researchgate.net

… Social distancing, masking, and hand hygiene are difficult to … to develop Obsessive-compulsive

disorder (OCD). … , in turn increasing the risk for OCD. This might also influence …

Save Cite Cited by 22 Related articles All 2 versions

Longitudinal trajectory of obsessive-compulsive symptoms in the general population during the COVID-19 pandemic

AD Costa, A Fernandes, S Ferreira, B Couto… - Neuroscience …, 2023 - ncbi.nlm.nih.gov

… COVID-19 pandemic led to a worldwide state of crisis with a significant impact on the mental

health … measures proclaimed to help prevent contracting the virus, such as washing hands, …

Save Cite Related articles All 2 versions

[PDF] researchsquare.com

The Relationship Between Covid-19 Fear and Obsessive-compulsive Disorder

M Dehghani, N Mousazadeh, S Almasi, H Ahmadinia… - 2022 - researchsquare.com

… virus after watching or listening to the news may lead to obsessive behaviors such as excessive

hand washing, and … Fear of COVID-19 and the mental health consequences in America. …

Save Cite Related articles All 3 versions

[HTML] frontiersin.org

[HTML] Challenges and opportunities for human behavior research in the coronavirus disease (COVID-19) pandemic

C Gentili, IA Cristea - Frontiers in psychology, 2020 - frontiersin.org

… , or gloves, and hand washing and disinfection of fomites. … , social anxiety, obsessive-compulsive)

would become difficult … of mental disorders or of negative effects on psychological …

Save Cite Cited by 25 Related articles All 9 versions

Covid-19 Pandemic and Worsening of OCD Symptoms in an Adolescent

AR Abright - 2021 - …

… COVID-19 pandemic and subsequent quarantine measures have been shown to cause

stress and to be associated with a negative impact on psychiatric disorders… hand-washing and …

Save Cite Related articles

[PDF] archive.org

[PDF] Severe childhood obsessive-compulsive disorder precipitated in COVID pandemic

AY Sayed - scholar.archive.org

… listen to news regarding COVID-19, about the steps for hand washing and began to follow

… -onset psychiatric disorders like OCD is important. A thorough psychological assessment …

Save Cite Related articles

27.4 Trajectories of Contamination-Related Fears During the Pandemic Among Adolescents: The Role of Baseline Anxiety and Depression

A Van Meter, E Anderson, E Mintz… - Journal of the American …, 2021 - ncbi.nlm.nih.gov

… with COVID-19 wane, the mental health consequences of the … , hand washing, and sanitizing

objects, may have led to compulsive washing rituals, which are symptoms present in OCD. …

Save Cite Related articles All 3 versions

[HTML] sagepub.com

Staying connected during the COVID-19 pandemic

QX Ng, KT Chee, MLZQ De Deyn… - International Journal of …, 2020 - journals.sagepub.com

… of patients with obsessive-compulsive disorder (OCD) or personality difficulties seeking …

the COVID-19 pandemic, we must not forget about its potential impact on mental health, …

Save Cite Cited by 54 Related articles All 9 versions

Pediatric mental health presentations and boarding: first year of the COVID-19 pandemic

P Ibeziako, K Kaufman, KN Scheer… - Hospital …, 2022 - publications.aap.org

… , hand-washing, and other infection control protocols adopted during the pandemic likely

also contributed to the overall increase in youth presenting with obsessive-compulsive disorder…

Save Cite Cited by 30 Related articles All 5 versions

[PDF] bvmj.in

[PDF] Severe childhood obsessive-compulsive disorder precipitated in COVID pandemic Afnan Y Sayed, Sharmishtha Deshpande, Bhooshan Shukla

AY Sayed - bvmj.in

… listen to news regarding COVID-19, about the steps for hand washing and began to follow

… -onset psychiatric disorders like OCD is important. A thorough psychological assessment …

Save Cite Related articles

The Perceived Impact of COVID-19 on OCD Symptomology

D Dennis - 2022 - search.proquest.com

… from COVID-19 and its variants, and behavioral changes in response to COVID-19 (eg, travel

plans, handwashing, … were not screened for other mental health disorders, which raises the …

Save Cite Related articles

[PDF] uswr.ac.ir

COVID-19 Pandemic and the Questionable Validity of Obsessive-Compulsive Questionnaires

J Abbasi Jondani - Practice in Clinical Psychology, 2022 - jpcp.uswr.ac.ir

… strategies include basic hygiene, such as washing hands thoroughly and regularly, … OCD

is among the most prevalent mental disorders (American Psychiatric Association, 2013), and …

Save Cite Related articles All 3 versions

[HTML] mdpi.com

[HTML] Covid-19 and psychological impact

N Bueno-Guerra - Encyclopedia, 2022 - mdpi.com

… The worldwide mental health burden associated to COVID-19… face mask use to periodic

handwashing and ventilation. This … of suffering from anxiety (ie, OCD patients) or depression (ie, …

Save Cite Cited by 4 Related articles All 4 versions

[PDF] journals.co.za

Full View

Climate Change and Mental Health implications in South Africa

U Subramaney, S Iyaloo, T Morar… - Wits Journal of Clinical …, 2022 - journals.co.za

… can impact OCD symptoms and the COVID-19 … OCD symptoms related to contamination

fears, such as an increased demand for handwashing, reinforcement of ritualistic handwashing, …

Save Cite Related articles All 4 versions

A qualitative examination of low-intensity cognitive behaviour therapy to reduce anxiety and depression during the COVID-19 pandemic

SJ Egan, R Shafran, TD Wade, S Ure, C Gill… - Clinical …, 2022 - Taylor & Francis

… impact of the COVID-19 pandemic on mental health in the … OCD symptoms regarding

contamination and germs being exacerbated by the pandemic resulting in increased handwashing. …

Save Cite Related articles All 6 versions

[HTML] nih.gov

[HTML] Psychodermatology in the Era of COVID-19

BR Ferreira, M Jafferany, L Misery - The Journal of Clinical and …, 2021 - ncbi.nlm.nih.gov

… 2019 (COVID-19) pandemic on mental health has been … with the later development of OCD

symptoms. This is consistent … ) and hand-washing in individuals with pre-existing OCD and/or …

Save Cite Cited by 2 Related articles All 6 versions

[HTML] wjgnet.com

[HTML] Review of the effects of SARS-CoV2 infection and COVID-19 on common pediatric psychiatric illnesses

K Balaram, M Ahmed, R Marwaha - World Journal of Meta-Analysis, 2021 - wjgnet.com

… targeting behaviors like excessive hand washing and intrusive thoughts of contamination.

This can lead to a cognitive dissonance in those with OCD as the COVID-19 pandemic has led …

Save Cite Related articles All 3 versions

[PDF] cambridge.org

Death anxiety in the time of COVID-19: Theoretical explanations and clinical implications

RE Menzies, RG Menzies - The Cognitive Behaviour Therapist, 2020 - cambridge.org

… role of death anxiety in mental health disorders. (3) To understand … in various presentations

of obsessive compulsive disorder, as … the time spent handwashing. Notably, this increase in …

Save Cite Cited by 295 Related articles All 19 versions

**page 14**

[PDF] The effect of curfew on the general mental well-being of the population in Saudi Arabia after the COVID-19 outbreak

AK Alhwimani, MR Elzahrani, AS Hilabi, GA Alghamdi… - Cureus, 2021 - cureus.com

… after the COVID-19 outbreak regarding mental illness. No … in the dimension of

obsessive-compulsive (mean score: 1.25) … like social distancing and handwashing were protective …

Save Cite Cited by 2 Related articles All 11 versions

[HTML] nih.gov

Analysis of nursing students' obsessive and coping behaviors during the COVID‐19 pandemic

G Bahçecioğlu Turan, S Köse… - … in Psychiatric Care, 2021 - Wiley Online Library

… a mean total COVID-19 Obsessive Compulsive Scale score of … that measures such as

washing hands, wearing a mask, not … , obsessions, and mental disorders outside of normal life. …

Save Cite Cited by 11 Related articles All 6 versions

A qualitative inquiry of parents' observations of their children's mental health needs during the COVID-19 pandemic

AM Barth, AC Meinert, KL Zopatti, D Mathai… - Children's Health …, 2022 - Taylor & Francis

… to exhibit OCD-like behaviors during the COVID-19 pandemic. … cracking and blistering due

to handwashing. [He] questions … In addition to handwashing, children were fearful of eating …

Save Cite Cited by 1 Related articles All 7 versions

The impact of coronavirus disease (COVID-19) pandemic on developing obsessive-compulsive disorder in saudi arabia

D Alateeq, H Almughera, T Almughera… - European …, 2021 - search.proquest.com

… lead to washing hands repeatedly until harm the skin. Objectives: To explore the incidence

of Obsessive-Compulsive Disorder (OCD) symptoms during COVID-19 pandemic among the …

Save Cite Related articles All 6 versions

Mental Health Post Pandemic: A Socio-Behavioural Perspective of Change in the Working Class

B Mohanraj, AC Singh - Community Mental Health and Well-Being in …, 2023 - igi-global.com

… COVID-19 epidemic has made social isolation the norm. Isolation from society and routines

such as hand-washing … likely to develop the obsessive-compulsive disorder than they had …

Save Cite Related articles

[PDF] ekb.eg

Effectiveness of Mindfulness Skills on Self-Efficacy and Suicidal Ideation among First-Year Nursing Students with Obsessive-Compulsive Symptoms during COVID-19 …

SM Ebrahem, S Diab Abd-elwahab… - … Egyptian Journal of …, 2022 - ejnsr.journals.ekb.eg

… COVID-19 pandemic has resulted in a huge rise in deaths, but it has also shown a major

propensity to negatively damage mental health, … increased efforts on hand washing and general …

Save Cite Related articles All 5 versions

Covid-19 Pandemic may have unique effects on emergency admissions for pediatric psychopathology: a single-center study

S Eray, V Sahin - Psychiatry and Behavioral Sciences, 2021 - search.proquest.com

… less on the unique clinical features of COVID-19 and mental health status in children, due to

… diagnosis of obsessivecompulsive disorder (OCD). Behaviors such as washing hands and …

Save Cite Cited by 9 Related articles All 6 versions

[PDF] washburn.edu

A Case Study of a Woman with Obsessions Related to COVID-19

AB Hunter, CL Turk… - Journal of Cognitive …, 2023 - connect.springerpub.com

… to anxiety even for people without OCD. Changes in school, … OCD and others at increased

risk for adverse mental health … acceptable to engage in a handwash following an exposure; …

Save Cite Related articles

[PDF] mdedge.com

[PDF] During a viral pandemic, anxiety is endemic: The psychiatric aspects of COVID-19

HA Nasrallah - Current Psychiatry, 2020 - cdn.mdedge.com

… health officials strongly urge washing one’s hands is very likely to exacerbate the compulsive

handwashing of persons with OCD … individuals with psychiatric illnesses, older adults who …

Save Cite Cited by 11 Related articles All 2 versions

[PDF] pjmhsonline.com

Development of Obsessive-Compulsive Disorder in Medical Versus Dental Practitioners During Covid 19 Pandemic

H Butt, SGA Mohsin, B Khalid, Z Waheed… - … of Medical & Health …, 2022 - pjmhsonline.com

… OCD in HCWs can be correlated with the sustained high-stress levels in these individuals.

COVID-19 spread has adversely affected the mental health … COVID-19 through hand washing …

Save Cite Related articles All 4 versions

[PDF] dergipark.org.tr

A Review on Anxiety and Obsessive Compulsive Disorder in the COVID-19 Process

U DOĞAN, S BALOĞLU - Biruni Sağlık ve Eğitim Bilimleri Dergisi, 2021 - dergipark.org.tr

… Obsessive-Compulsive Disorder (OCD) may be more affected by the Covid-19 epidemic

compared to other psychiatric disorders… of contamination and ruminative hand washing. Another …

Save Cite Related articles

[PDF] researchgate.net

[PDF] Illness Perception, Personality Traits and Obsessions in Healthcare Employees After Coronavirus Disease (COVID-19)

ET Sultan, BE Menku, B Genis… - Psychiatry and Behavioral …, 2022 - researchgate.net

… various mental health problems during the COVID-19 outbreak. … in the form of repetitive hand

washing were found to be %… impact of COVID-19 on people with confirmed OCD diagnosis, …

Save Cite Related articles All 5 versions

[PDF] researchsquare.com

Prevalence of OCD symptoms in the UAE during the COVID-19 pandemic: a cross-sectional study

NB Al Nasere, AM Ali, LAM Ali, HE Ibrahim, LM Kassas… - 2022 - researchsquare.com

… that the COVID-19 pandemic is a possible stressor, healthcare … of mental health deterioration

in the form of inducing OCD. … bulk-buying, and excessive hand washing. This might have …

Save Cite Related articles All 3 versions

[PDF] iprpk.com

Fear of COVID-19 and Socio-cultural factors as Predictors of Sleep disturbances among Obsessive Compulsive Disorder Patients

M Siddiqui, SA Noor, A Sarfaraz - Journal of Professional & Applied …, 2022 - iprpk.com

… with psychological disorders. The objective of the current study was to examine the impact

of fear related to COVID-19 … The rising efforts of washing hands and hygiene practices have …

Save Cite Related articles All 2 versions

[PDF] ijbscps.com

A Study of Psychiatric Comorbidity and Fear of Corona Virus in Patients with Obsessive Compulsive Disorder during Covid-19 Pandemic

B Gupta, T Bansal, S Singh, A Nischal - Indian Journal of Behavioural …, 2022 - ijbscps.com

… the chinese outbreak of COVID-19 to be health risk of national … on mental health , especially

for patients of OCD in various … , hand hygiene and respiratory hygiene by wearing masks. …

Save Cite Related articles All 2 versions

[HTML] nih.gov

Prevalence and risk factors of psychiatric symptoms and diagnoses before and during the COVID-19 pandemic: findings from the ELSA-Brasil COVID-19 mental health …

AR Brunoni, PJC Suen, PS Bacchi, LB Razza… - Psychological …, 2023 - cambridge.org

… bRecommendations were: washing hands frequently, removing shoes before entering their

… the rate of collapsed depressive disorders, anxiety disorders, OCD, and CMD between the …

Save Cite Cited by 57 Related articles All 11 versions

[HTML] psychiatryonline.org

[HTML] Forming a Doctor-Patient Alliance During COVID-19 to Enhance Treatment Outcomes for Obsessive-Compulsive Disorder

DE Stubbe - FOCUS, 2021 - Am Psychiatric Assoc

… (COVID-19) pandemic in early 2020 has caused or exacerbated mental health problems, …

He agreed that his extreme handwashing had left his hands red, raw, and sore and perhaps …

Save Cite Related articles All 6 versions

[HTML] plos.org

[HTML] The impact of the COVID-19 pandemic on mental health and functional outcomes in Veterans with psychosis or recent homelessness: A 15-month longitudinal …

JK Wynn, A McCleery, DM Novacek, EA Reavis… - PloS one, 2022 - journals.plos.org

… about contamination and obsessive behaviors (such as hand washing) [13]. It has also been

… outcomes, including depression, anxiety, and OCD-like behaviors, during the first months of …

Save Cite Cited by 6 Related articles All 14 versions

[PDF] cambridge.org

Exercise addiction, body dysmorphic disorder, and use of enhancement drugs during the COVID-19 pandemic confinement period: A transcultural study

AR Dores, I Carvalho, J Burkauskas, V Beretta… - European …, 2021 - cambridge.org

… used: Covid-19; SARS-Cov2; pandemic; obsessive compulsive … frequency of hand washing

and the importance of following … changes and how they affect physical and mental health-…

Save Cite Cited by 1 Related articles All 9 versions

[PDF] ed.gov

Life in Lockdown: Child and Adolescent Mental Health and Well-Being in the Time of COVID-19.

M Sharma, P Idele, A Manzini, CP Aladro, A Ipince… - UNICEF Office of …, 2021 - ERIC

… , lockdowns, curfews, quarantine, handwashing and physical distancing. While a number

of … , social anxiety, substance abuse, obsessive compulsive disorder (OCD) and PTSD.There …

Save Cite Cited by 21 Related articles All 4 versions

**page 15**

Impact of COVID-19 epidemic in prevalence of obsessive-compulsive disorder.

NU Leghari, HS Ahmad, K Iqbal… - The Professional Medical …, 2022 - theprofesional.com

… to influence mental health. Obsessive-compulsive symptoms during COVID-19 may exacerbate

… being infected involve rituals such as increased hand washing. People of all ages with …

Save Cite Related articles All 6 versions

Paternal postpartum depression in an obsessive personality following the COVID-19 lockdown successfully treated with Vortioxetine

L Orsolini, S Pompili, V Salvi, U Volpe - European Psychiatry, 2022 - search.proquest.com

… the mental health impact of the current COVID-19 pandemic … Studies shows that wearing

facemasks and hand washing seems … -old man with an obsessive-compulsive personality who …

Save Cite Related articles All 6 versions

[PDF] skeenapublishers.com

[PDF] The COVID-19 Pandemic Impact on Patients with Obsessive Compulsive Disorder. Int. Jr

HR Khouzam - Infect Dis & Epidemlgy, 2020 - skeenapublishers.com

… of COVID-19 such as the constant sanitizing and hand washing, … from obsessive compulsive

disorder (OCD). Patients with … of OCD are not the result of another psychiatric disorder, a …

Save Cite Related articles All 2 versions

HEALTH-RELATED ANXIETY, GENERALIZED ANXIETY, OBSESSIVE COMPULSIVE TENDENCIES, AND COVID-19 ANXIETY AMONG VACCINATED AND NON …

Q Abbas, M Shahzadi, S Ehsan… - Pakistan Journal of …, 2022 - search.proquest.com

… Hand-washing and social distancing triggered the fear of … in psychological impacts following

the receipt of the COVID-19 … to COVID-19 anxiety and associated mental health issues …

Save Cite Related articles All 3 versions

[HTML] nih.gov

[HTML] … Compulsive Disorder During the Initial Stage of COVID-19 Pandemic: Effect of Contamination Symptoms and Poor Insight on Obsessive-Compulsive Disorder …

RG Tulacı, ÖD Tulacı, N Dolapoğlu - … Journal of nervous and mental …, 2022 - ncbi.nlm.nih.gov

… insight in a number of psychiatric disorders including OCD. The semistructural scale is …

Furthermore, cleaning, viral transmission from people and surfaces, frequent hand washing, …

Save Cite Related articles All 7 versions

[PDF] ekb.eg

International Egyptian Journal of Nursing Sciences and Research (IEJNSR)

AA WAHBA - journals.ekb.eg

… a strict emphasis on hand washing and disinfection, various … how to manage OCD under

COVID-19 echoes similar anxieties… Perhaps no group of individuals with mental illness is as …

Save Cite Related articles All 5 versions

[HTML] nih.gov

A cross-sectional study on mental health among health care workers during the outbreak of Corona Virus Disease 2019

W Cai, B Lian, X Song, T Hou, G Deng, H Li - Asian journal of psychiatry, 2020 - Elsevier

… the psychological abnormality in health care workers battling the COVID-19 epidemic and

to … to show some obsessive-compulsive symptoms such as washing hands repeatedly. The …

Save Cite Cited by 304 Related articles All 6 versions

[HTML] springer.com

[HTML] State and Trait Risk and Resilience Factors Associated with COVID-19 Impact and Obsessive–Compulsive Symptom Trajectories

A Fang, NC Berman, SS Hoeppner, EC Wolfe… - International Journal of …, 2021 - Springer

… factor of COVID-19 impact, and given that COVID-19 impact … to assess COVID-19’s effects

on mental health. Since then, … behaviors (eg, excessive handwashing or cleaning, heavy use …

Save Cite Cited by 3 Related articles All 5 versions

Psychiatric morbidities in COVID-19 pandemic-An overview.

A Selvaraj, V Dass - Annals of Indian Psychiatry, 2020 - go.gale.com

… As frequent handwashing and cleanliness is advised as an … Yale OCD research clinic 'Overall

a pattern that OCD specialist … now to address the mental health needs associated with the …

Save Cite Cited by 1 Related articles All 2 versions

[HTML] springer.com

[HTML] The COVID-19 pandemic and its effect on mental health in USA–a review with some coping strategies

B Bhattacharjee, T Acharya - Psychiatric Quarterly, 2020 - Springer

… In the COVID-19 pandemic, people are required to wash their … handwashing may develop

into an obsessive-compulsive … to manage mental health during the current COVID-19 crisis. …

Save Cite Cited by 107 Related articles All 10 versions

Delivering Exposure and Response Prevention for Contamination Fear During the COVID-19 Health Crisis: Clinicians' Attitudes and Emotional Reactions

C Minaya - 2021 - search.proquest.com

… the COVID-19 outbreak, on pandemics and mental health does not include investigations into

OCD and/or exposure or mental health … Treatment for OCD during COVID-19 will be briefly …

Save Cite Related articles All 2 versions

[PDF] mdpi.com

Psychological impact of the COVID-19 outbreak on mental health outcomes among youth: A rapid narrative review

F Cielo, R Ulberg, D Di Giacomo - … Research and Public Health, 2021 - mdpi.com

… rate of obsessive-compulsive disorders [32], mostly with regard to the extensive suggestion

about handwashing as a preventive action for COVID-19 infection. In general, the worsened …

Save Cite Cited by 77 Related articles All 14 versions

[PDF] dergipark.org.tr

COVID-19-Related Obsessions and Its Predictors: A Community-Based Research in Turkey

EÇ TANRIVERDİ, BA CEVHEROĞLU… - … and Experimental Health … - dergipark.org.tr

… societal mental health is affected by the COVID-19 pandemic. As stated earlier, how Covid-19

affects OCD … We think that constant hand washing for protection, disinfectant use, and the …

Save Cite Related articles

[PDF] sadag.org

Obsessive-Compulsive Disorder (OCD) and covid-19

S Friedland - Mental Health Matters, 2021 - journals.co.za

… around germs, a virus, getting sick and death it would be remiss not to discuss Obsessive

Compulsive Disorder (OCD). OCD is a mental health disorder that can affect anyone no matter …

Save Cite Related articles All 4 versions

COVID-19 Related Stress Reactions in Patients with Obsessive-Compulsive Disorder.

WM Abohendy, EF Elsemary… - Arab Journal of …, 2023 - search.ebscohost.com

… mental disorders. In this study, we aimed to assess the effects of the COVID-19 pandemic on

patients with OCD and healthy … compulsions, such as excessive hand-washing, was like. Still…

Save Cite Related articles

[PDF] journalppw.com

Women Are Not Ok: Anxiety Spectrum Disorder And Women During COVID-19 Pandemic

MH Baglari, S Dhar - Journal of Positive School Psychology, 2022 - mail.journalppw.com

… continuous hand washing, several doubts about the illness and … of COVID-19 preventions

by general and mental health care … Moreover for obsessional rituals in OCD, can be worked …

Save Cite Related articles All 4 versions

Investigation on health and professional consciousness and mental health of military medical students during coronavirus disease 2019 epidemic

K Chen, CQ Xing, JX Zhang, LJ Zhao… - … Journal of Naval …, 2022 - pesquisa.bvsalud.org

… , and health and professional consciousness during COVID-19 … Students could basically form

the habits of washing hands … SCL-90 factors were obsessive-compulsive disorder (78.53%, …

Save Cite Cited by 1 Related articles All 2 versions

[PDF] jobiost.com

Evaluation of Depression and Obsessive Compulsive Disorder in University Students During the COVID-19 Pandemic

A Gilandoust, F Amini Khodashahri - International Journal of BioLife …, 2022 - jobiost.com

… as social distancing and hand washing to prevent the spread … show that the covid-19 pandemic

can cause mental disorders such as … of mental disorders in students after the pandemic. …

Save Cite Related articles

[HTML] springer.com

[HTML] The impact of COVID-19 social distancing and isolation recommendations for Muslim communities in North West England

SM Hassan, A Ring, N Tahir, M Gabbay - BMC Public Health, 2021 - Springer

… of the pandemic on their mental health and wellbeing [4]. … stereotypical and timed hand

washing processes’ advocated … such as anxiety, panic and obsessive-compulsive symptoms) [32] …

Save Cite Cited by 22 Related articles All 14 versions

Impact of exercise addiction on quality of life during COVID-19: mediating role of obsessive-compulsive disorder and physiological symptoms

A Shukla, R Chaturvedi - International Journal of Sport and …, 2023 - Taylor & Francis

… boost immunity to prevent the COVID-19 virus (Ministry of health and family welfare,

Citation2020b… OCD is a mental disorder characterised by obsessive-compulsive thoughts caused …

Save Cite Related articles

**page 16**

Impact Of The Covid-19 Outbreak On Mental Health And Public Practices In Rural Communities In China

W Liang - 2023 - elischolar.library.yale.edu

… and washing hands increased significantly after the COVID-19 … , p<0.01), having

obsessive-compulsive disorder (aOR=4.75, p… Overall, the COVID-19 outbreak has significantly …

Save Cite Related articles

[PDF] ejmi.org

[PDF] Comparison of Frontline Healthcare Professionals and Other Healthcare Professionals in terms of Depression, Anxiety, Stress, Obsessive-Compulsive …

ZG Yagci, GG Ozcan, T Yagci, D Ceylan - Eurasian Journal of Medical …, 2022 - ejmi.org

… hand washing, which entered our daily lives with the … COVID-19 are more common, Anxiety

levels were found to be significantly higher in those with chronic illness and mental illness.[27…

Save Cite Related articles All 2 versions

[PDF] researchgate.net

[PDF] Relationships between History of COVID-19 Disease, Anxiety, and Symptoms of Obsessive Compulsive Disorder (OCD) in Adolescents Age 20-24 Years

AN Christanti, WS Ningyas, A Karimah… - … and Child Health, 2023 - researchgate.net

… The mental health impact of the pandemic on adolescents must also be considered. Adolescents

… hand washing by other family members all play a preventive role from exacerbation of …

Save Cite Related articles

[HTML] amhonline.org

[HTML] Impact of COVID-19 on death anxiety in patients with anxiety spectrum disorders: A case–control study

S Chakraborty, P Sinha, A Pratap, B Das… - … of Mental Health, 2022 - amhonline.org

… obsessive-compulsive disorder and panic disorder are experiencing a detrimental impact on

mental health … , such as handwashing and physical distancing, have impacted patients with …

Save Cite Cited by 1 Related articles All 5 versions

[PDF] opastpublishers.com

[PDF] H., Zafar, S., Raza

S Murad, Z Tanveer - A, A., Zafar, R., et, al, 2023 - opastpublishers.com

… of the COVID-19 crisis on population mental health remains … Frequent handwashing, which

was previously considered … , suggests an impact of COVID-19 on OCD related. In the light of …

Save Cite Related articles

[PDF] dspacedirect.org

Framing the Narrative: The Effects of the COVID-19 Pandemic on Subclinical Obsessive-Compulsive Traits and Biased Memory Recall

G DePamphilis - 2023 - utampa.dspacedirect.org

… Factors such as demand for proper hand washing, justification of hygiene, normalization

of … COVID-19 pandemic and mental health consequences: Systematic review of the current …

Save Cite Related articles

The Impact of COVID-19 Pandemic on Obsession and Compulsion Symptoms in Saudi Arabia

A Naseem, A Abdulaziz, AT Tariq, A Muhammad… - Cureus, 2021 - search.proquest.com

… impact of the COVID-19 pandemic on mental health. Several … which can arise from hand

hygiene recommendations that are … between OCD symptoms during the COVID-19 pandemic …

Save Cite Related articles

[PDF] jpad.com.pk

Epidemiology of Occupational Contact Dermatitis (OCD) on health workers in Covid-19

A Yuindartanto, CRS Prakoeswa… - Journal of Pakistan …, 2023 - jpad.com.pk

… causes OCD the most, followed by hand hygiene activities. High risk factors for OCD include

a family history of atopic illnesses, history of asthma and an early history of atopic dermatitis. …

Save Cite Related articles All 5 versions

[PDF] nsj.org.sa

Prevalence of post-COVID symptoms of obsessive-compulsive disorder in Saudi Arabia

MA Alblowi, WM Alkhammash, TM Alzahrani… - Neurosciences …, 2023 - nsj.org.sa

… addressing mental health in Saudi Arabia post COVID-19 … infection, need for frequent hand

hygiene, wearing masks, social … of how COVID-19 has specifically impacted people with OCD …

Save Cite Related articles All 10 versions

[PDF] cambridge.org

Impact of personality hardiness on anxiety dynamics during the COVID-19 outbreak in russia

D Dovbysh, V Epishin, A Salikhova… - European …, 2021 - cambridge.org

… , which may lead to washing hands repeatedly until harm the … in respondents with new onset

OCD symptoms. This implies … Eating disorders were among these reported mental health …

Save Cite Related articles All 6 versions

[HTML] frontiersin.org

[HTML] How Different Pre-existing Mental Disorders and Their Co-occurrence Affects COVID-19 Clinical Outcomes? A Real-World Data Study in the Southern United …

S Qiao, J Zhang, S Chen, B Olatosi… - … in public health, 2022 - frontiersin.org

… thought disorders [eg, obsessive-compulsive disorder (OCD), … these mental disorder clusters

in affecting COVID-19 clinical … Some prevention recommendations, such as hand washing, …

Save Cite Cited by 2 Related articles All 8 versions

Covid-19 Pandemic and Worsening of OCD Symptoms in an Adolescent

A Andujar, A Paley, AR Abright - Journal of Scientific Innovation …, 2021 - scholar.archive.org

… COVID-19 pandemic and subsequent quarantine measures have been shown to cause

stress and to be associated with a negative impact on psychiatric disorders… hand-washing and …

Save Cite Related articles All 4 versions

New Onset OCD in a young female: COVID 19 pandemic as stressor; A Case Report

S Singh, G Kumar - Indian Journal of Psychiatry, 2022 - ncbi.nlm.nih.gov

… repeated handwashing and … OCD is sixth most disabling psychiatric disorder with lifetime

prevalence of 1.9–3.3%. Among wide variety of problems faced by patients of OCD, COVID 19 …

Save Cite Related articles All 7 versions

[PDF] scienceopen.com

[PDF] Religious coping in time of covid 19 in tunisia

S Ajmi, S Hentati, R Masmoudi, R Sellami… - European …, 2021 - scienceopen.com

… , which may lead to washing hands repeatedly until harm the … in respondents with new onset

OCD symptoms. This implies … Eating disorders were among these reported mental health …

Save Cite Related articles All 10 versions

[PDF] researchgate.net

[PDF] The COVID-19 crisis and lockdown in India: Effects on psycho-social health and well-being

D Banerjee - Indian Journal of Health and Wellbeing, 2020 - researchgate.net

… and resultant lockdown in India, focusing on the various facets of mental health. It then …

Obsessive compulsive symptoms secondary to repeated instructions of rigorous hand washing …

Save Cite Cited by 3 Related articles All 4 versions

[PDF] lww.com

COVID-19 and mental health

R Doomra - Journal of Family Medicine and Primary Care, 2020 - journals.lww.com

… The behavioral symptoms may be associated with insomnia, … with obsessive compulsive

disorder may have obsession of contamination of hands, leading to compulsive hand washing, …

Save Cite Related articles All 7 versions

[PDF] cambridge.org

The scope of mental health research during the COVID-19 pandemic and its aftermath

M Hotopf, E Bullmore, RC O'Connor… - The British Journal of …, 2020 - cambridge.org

… to people with pre-existing disorders – for example those with obsessive–compulsive …

may be particularly affected by advice to hand-wash, or those with psychotic disorders may be …

Save Cite Cited by 91 Related articles All 15 versions

[HTML] ssu.ac.ir

[HTML] Psychiatric Complications in Patients with COVID-19: A Narrative Review

SM Hashemi, M Nobakht, A Ghazalgoo… - Critical Comments in …, 2021 - ccbjournal.ssu.ac.ir

… The effect of the COVID-19 pandemic on psychological health has been established. The …

symptoms of OCD and other similar anxiety disorders, such as obsessive hand hygiene and …

Save Cite Related articles

[PDF] casestudiesjournal.com

[PDF] Psychological Effects of COVID-19: A Barrier to Job Engagement in the Egyptian Organizations

WA Nafei - casestudiesjournal.com

… the effects of COVID-19 on mental health, economics, and … relationship between psychological

effects of COVID-19 (OCD) … of hand washing, sterilization, and others. Also, the spread of …

Save Cite Related articles All 3 versions

[HTML] nih.gov

[HTML] Mental health of parents of children with autism spectrum disorder during COVID-19 pandemic: A systematic review

B Yılmaz, M Azak, N Şahin - World journal of psychiatry, 2021 - ncbi.nlm.nih.gov

… recommendations such as comprehensive and frequent hand washing, maintaining social

distance, avoiding in-person contact and wearing a facemask[7]. Groups with special needs …

Save Cite Cited by 32 Related articles All 10 versions

**page 17**

Unrealistic pessimism and obsessive‐compulsive symptoms during the COVID‐19 pandemic: Two longitudinal studies

L Jelinek, G Röhrig, S Moritz, AS Göritz… - British Journal of …, 2022 - Wiley Online Library

… handwashing and information in the media about the survivability of viruses on surfaces and

thus increased mental … with a self-reported diagnosis of OCD by a mental health expert (eg, …

Save Cite Cited by 2 Related articles All 14 versions

[PDF] ijmhns.com

Phenomenology and severity of symptoms in OCD patients after COVID 19

U Nandhini, A Vedachalam, PP Kannan… - … Journal of Mental Health …, 2021 - ijmhns.com

… , obsessions of contamination and compulsive hand washing are amongst the commonest.

… prevalence of OCD symptoms increased during the early phase of the COVID-19 pandemic, …

Save Cite Related articles All 3 versions

[PDF] maastrichtuniversity.nl

[PDF] COULD PROTECTIVE MEASURES FOR COVID-19 CONTRIBUTE TO THE WORSENING OF OBSESSIVE-COMPULSIVE SYMPTOMS?

S Baldi, KRJ Schruers - On connecting dots - cris.maastrichtuniversity.nl

… , and compulsions related to hand washing or cleaning … mental illness and consequent

isolation from society normally has on individuals affected by this or other psychiatric disorders…

Save Cite Related articles

[PDF] cambridge.org

The COVID-19 pandemic and its psychological impact on tunisian health professionals

L Aribi, R Jbir, N Messedi, O Bouattour, N Kolsi… - European …, 2021 - cambridge.org

… of caregivers to COVID-19 for their mental health by studying … clearer recommendations are

washing hands and surfaces. … if there are changes in OCD symptoms during the pandemic. …

Save Cite Related articles All 6 versions

[HTML] springer.com

[HTML] COVID-19 related stress and fears of contamination: the impact of feared self-perceptions

JS Audet, S Jacmin-Park, S Kheloui, C Gravel… - Current …, 2023 - Springer

… from obsessive-compulsive disorder (OCD) during the COVID-19 … hand washing in order to

safeguard against this feared self. … Effects of Covid-19 lockdown on mental health and sleep …

Save Cite Related articles All 5 versions

[HTML] nih.gov

Psychopathological burden and coping strategies among frontline and second-line Italian healthcare workers facing the COVID-19 emergency: Findings from the …

G Sani, D Janiri, L Moccia, U Albert, G Carrà… - … of Affective Disorders, 2022 - Elsevier

… the impact of the COVID-19 pandemic on mental health. The full … found more obsessive-compulsive

symptoms in healthcare … as frequent disinfecting and/or handwashing, in addition to …

Save Cite Cited by 10 Related articles All 13 versions

[PDF] edarxiv.org

COVID-19 impact on students

A Pragholapati - 2020 - edarxiv.org

… , and washing hands with soap. The Indonesian Ministry of … ", "Developing obsessive-compulsive

behavior about the … review of the effects of COVID-19 on mental health, a number of …

Save Cite Cited by 239 Related articles All 6 versions

Fluoxetine-Induced Serum Sickness-Like Reaction in an Adolescent with Obsessive Compulsive Disorder and Diabetes

Y Bez, BJ Coffey - Journal of child and adolescent …, 2021 - liebertpub.com

… that she felt like there were germs all around, saying ‘‘my biggest thing is hand washing.’’ …

COVID-19 infection around which time all family members were anxiously cleaning. Her OCD …

Save Cite Cited by 1 Related articles All 6 versions

[PDF] upc.edu.pe

Effects of the COVID-19 pandemic on the prevalence of obsessive-compulsive symptoms among young adults in Peru

GBM Nicolas, BR Ivana, SA Valeria, ZTJ Hanae - 2022 - repositorioacademico.upc.edu.pe

… pandemic, including social distancing, hand washing, and the use of face masks that cover

… that have focused on mental disorders prevalence during the COVID-19 pandemic, found …

Save Cite Related articles All 3 versions

[DOC] uu.nl

Obsessive-compulsive disorder during the COVID-19 pandemic: the relationship between symptoms and the use of various media

O Hagen - 2022 - studenttheses.uu.nl

… affects people across the globe, there is a specific group with existing mental health …

symptoms, the fear of spreading or acquiring diseases and excessive cleaning or hand washing are …

Save Cite Related articles

Obsessive-compulsive disorder onset and COVID-19 pandemic: Is there a relation between both?

J Aldeias, F Polido, MDC Cruz - European Psychiatry, 2021 - cambridge.org

… Since the COVID-19 pandemic began, he stopped working … His thoughts led to cleaning and

hand-washing rituals, spending a … During 10 years of psychiatric follow-up he never showed …

Save Cite Related articles All 6 versions

[PDF] onlinescientificresearch.com

[PDF] Anxiety and Depression in Youth During COVID-19: A Narrative Review

T Field - Journal of Psychiatry Research Reviews & …, 2021 - onlinescientificresearch.com

… OCD and that relationship was mediated by emotional reactivity, avoidance and depression/

anxiety. OCD was exacerbated by handwashing, … cited as limited mental health services that …

Save Cite Related articles All 5 versions

[PDF] researchgate.net

[PDF] Impact Of COVID-19 Pandemic On Mental Health In Pakistan: A Systematic Review

B Saeed, SS Batool, SA Batool, H Saeed… - Webology (ISSN: 1735 …, 2022 - researchgate.net

… Excessive hand washing and importance of personal hygiene due … OCD during quarantine

suggesting that there was a strong connection between the COVID-19 and worsening of OCD …

Save Cite Related articles All 4 versions

Evaluation of sleeping problems among caregivers of children that take therapy in the national center for children rehabilitation and treatment during COVID-19 …

F Dobi, B Zenelaj, E Kabili, E Ruci… - European …, 2021 - search.proquest.com

… : Covid-19; SARS-Cov2; pandemic; obsessive compulsive … frequency of hand washing and

the importance of following … Keywords: mental health; Binge eating; COVID-19; health care …

Save Cite Related articles All 6 versions

[HTML] sciencedirect.com

[HTML] Early impact of COVID-19 quarantine on the perceived change of anxiety symptoms in a non-clinical, non-infected Italian sample: Effect of COVID-19 …

S De Pietri, C Chiorri - Journal of affective disorders reports, 2021 - Elsevier

… , and obsessive-compulsive symptomatology before the … suggest the need to address mental

health issues as a core … -media insistently recommended frequent hand washing and use of …

Save Cite Cited by 17 Related articles All 4 versions

[PDF] researchgate.net

[PDF] Psychological aspects of COVID-19

M Jafferany - researchgate.net

… While obsessive compulsive disorder (OCD) due to COVID-19 … The constant hand washing

as a precaution measure to … of mental health problems in those diagnosed with COVID-19, …

Save Cite Related articles All 2 versions

Effects of COVID-19 on OCD Severity and Coping Strategies

M Hounton - The Impact of the COVID-19 Pandemic on Child …, 2022 - igi-global.com

… Behaviors such as disinfecting surfaces or washing hands … OCD, but those with mental

health disorders, more generally. There have been discussions about new variants of COVID-19, …

Save Cite Related articles All 2 versions

[PDF] researchgate.net

[PDF] CHAPTER-25 COVID-19 AND OUR CHILDREN: AN ACCOUNT OF MENTAL HEALTH CRISIS

P Ghosh, MB Mondal - COVID-19 PANDEMIC - researchgate.net

… instructions like washing hands, wearing … Obsessive Compulsive disorder was once

considered rare in children, but recent advances in diagnosis and treatment have shown that OCD is …

Save Cite Related articles All 2 versions

[PDF] jcreview.com

[PDF] Mental and behavioral changes during COVID 19 pandemic and how to deal with it

M Philip, CC Mahakalka, MN Kapl… - Journal of Critical …, 2020 - jcreview.com

… to prevent COVID-19 disease is by hand washing or using an … mental health challenges,

patients infected with COVID-19, … Patients can develop obsessive-compulsive disorder (OCD) as …

Save Cite Cited by 12 Related articles All 3 versions

[PDF] cambridge.org

Covid-19 Barrier gestures for patients with schizophrenia: A therapeutic “dead end”?

I Bouguerra, E Khelifa, B Abassi, SB Aissa… - European …, 2022 - cambridge.org

… mask wearing and washing hands status. Knowledge about … the COVID-19 outbreak and

lockdown on the mental health of … years-old man with an obsessive-compulsive personality who …

Save Cite Related articles All 6 versions
